# Supplementary material
Source: PubMed Central journal article supplement (PMC2996461)

Peptide: DADPDTFFAK

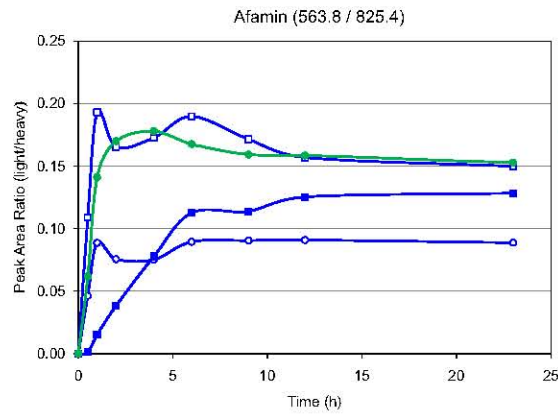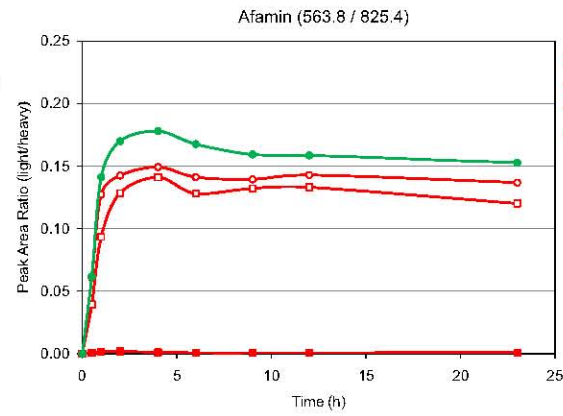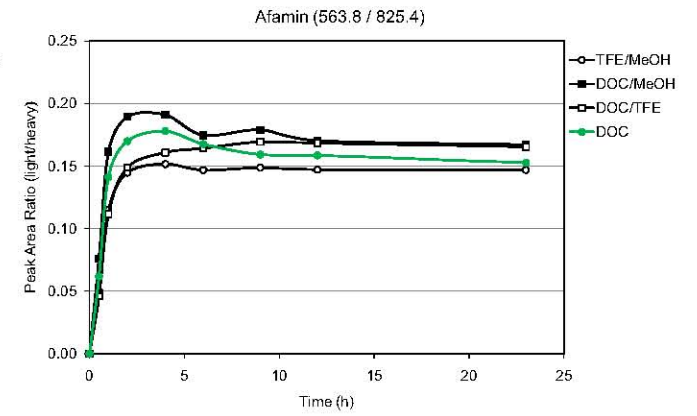

Peptide: LVNEVTEFAK

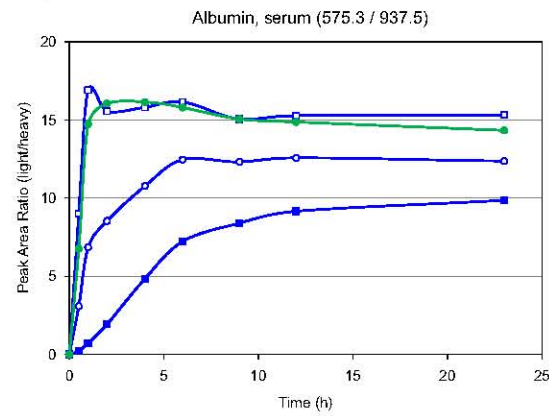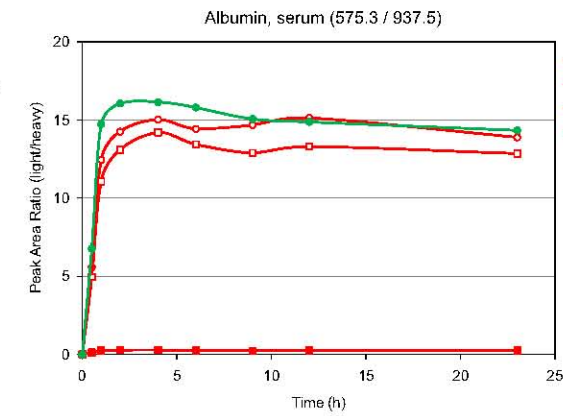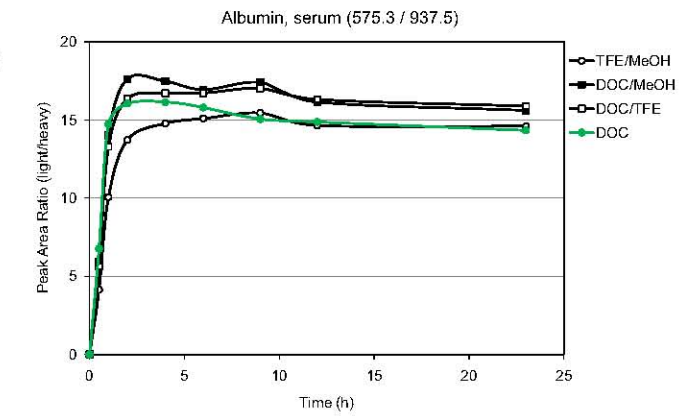

Peptide: NWGLSVYADKPETTK

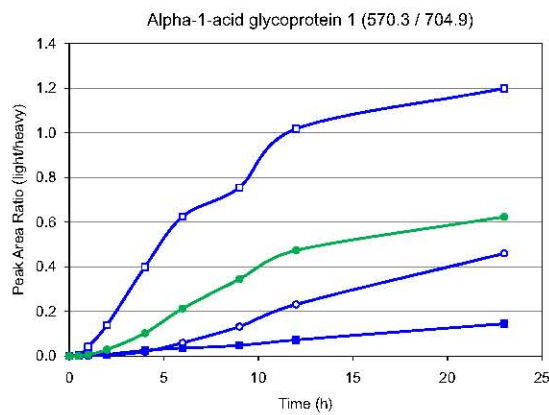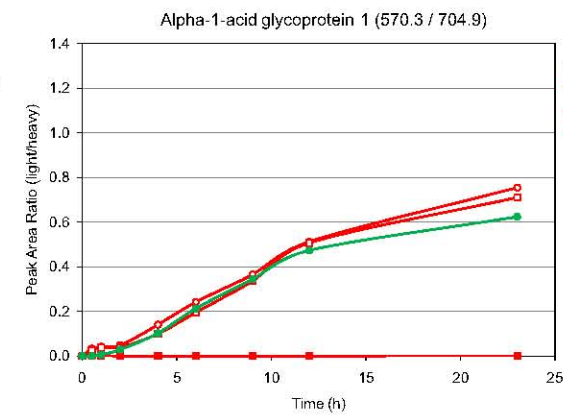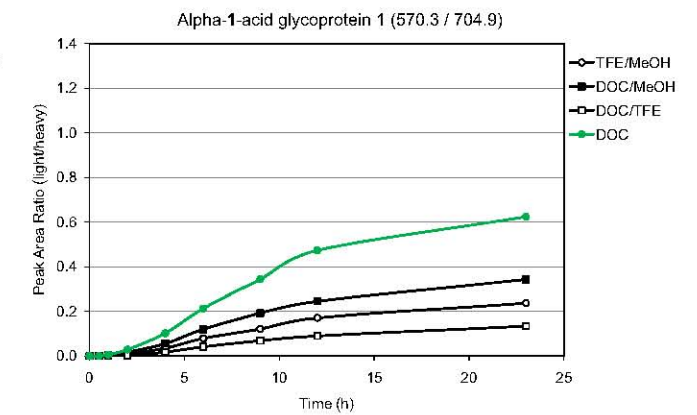

Peptide: EIGELYLPK

Alpha-1-antichymotrypsin (531.3 / 633.4)

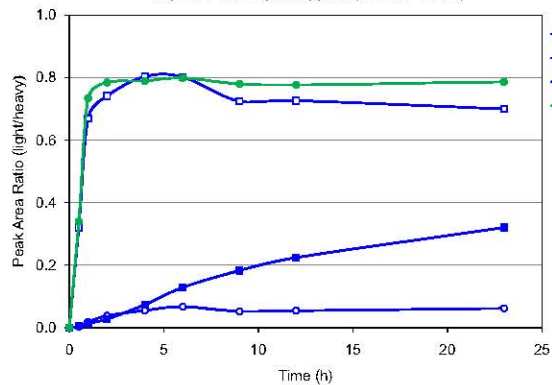

Alpha-1-antichymotrypsin (531.3 / 633.4)

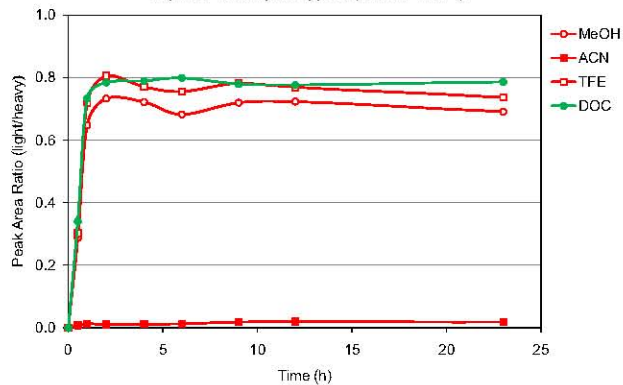

Alpha-1-antichymotrypsin (531.3 / 633.4)

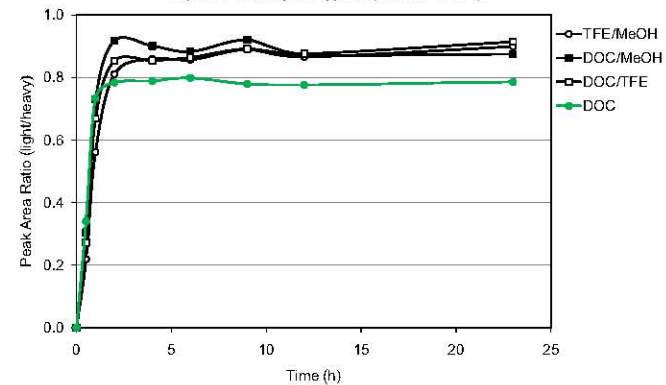

Peptide: LETPDFLQFK

Alpha-1B-glycoprotein (619.3 / 894.5)

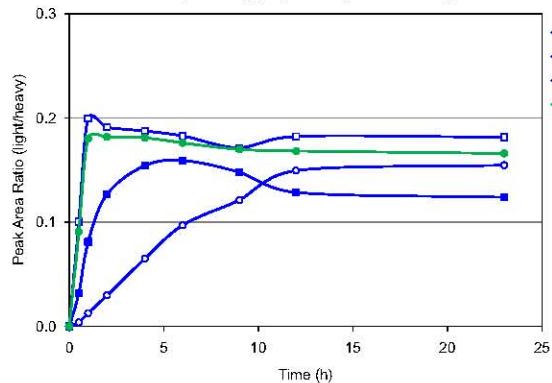

Alpha-1B-glycoprotein (619.3 / 894.5)

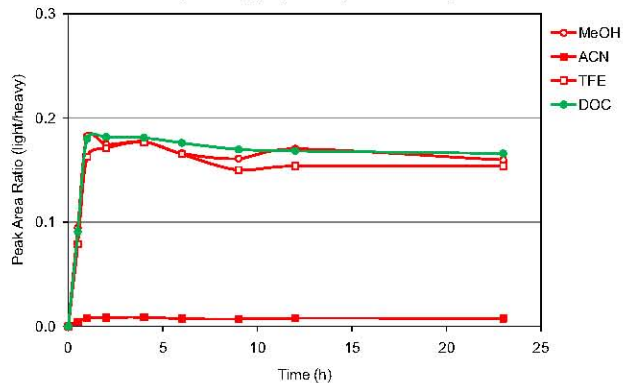

Alpha-1B-glycoprotein (619.3 / 894.5)

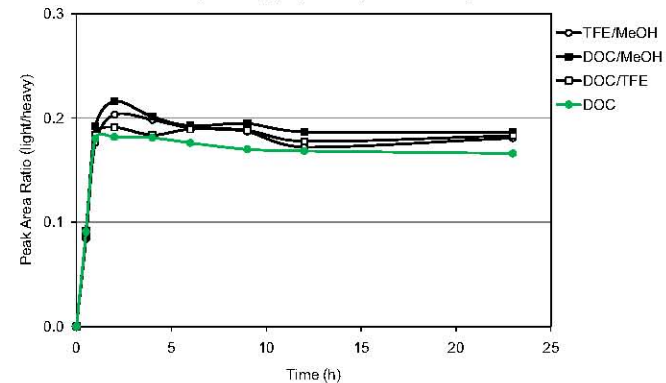

Peptide: LGNQEPGGQTALK

Alpha-2-antiplasmin (656.8 / 771.4)

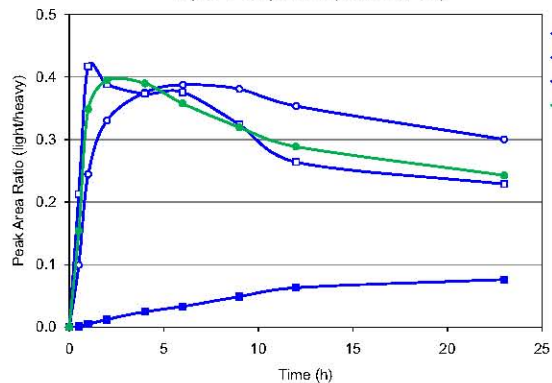

Alpha-2-antiplasmin (656.8 / 771.4)

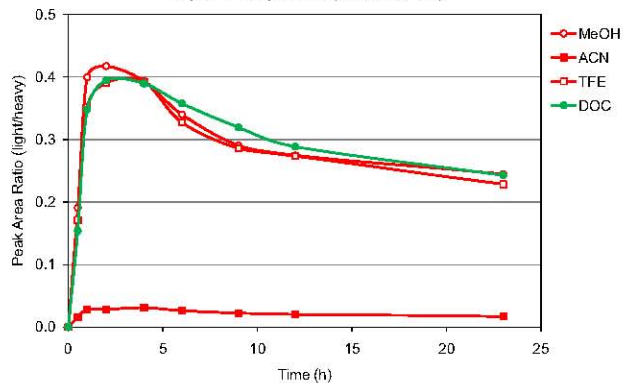

Alpha-2-antiplasmin (656.8 / 771.4)

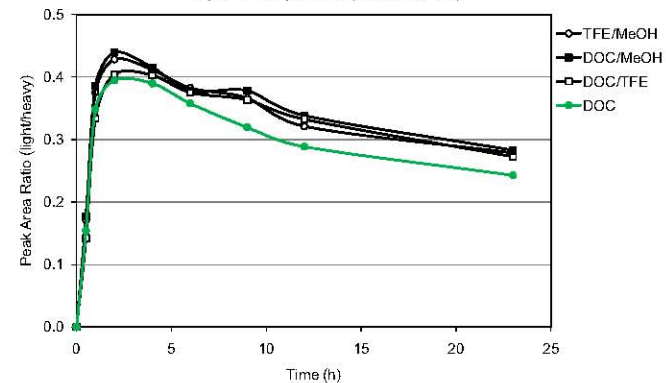

Peptide: LLIYAVLPTGDVIGDSA

alpha-2-macroglobulin (615.7 / 586.8)

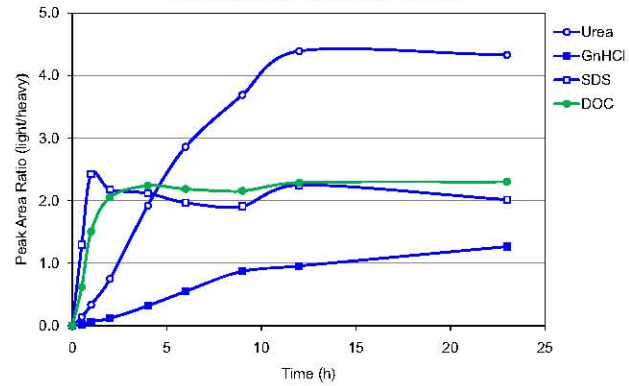

alpha-2-macroglobulin (615.7 / 586.8)

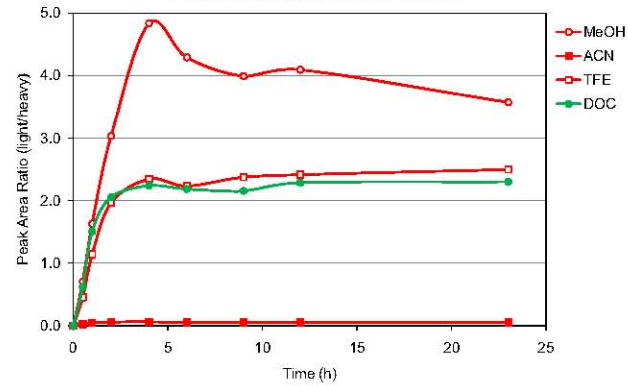

alpha-2-macroglobulin (615.7 / 586.8)

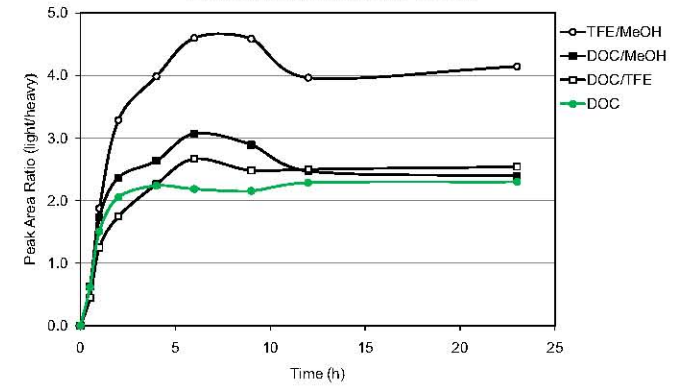

Peptide: ALQDQLVLA

angiotensinogen (634.9 / 542.8)

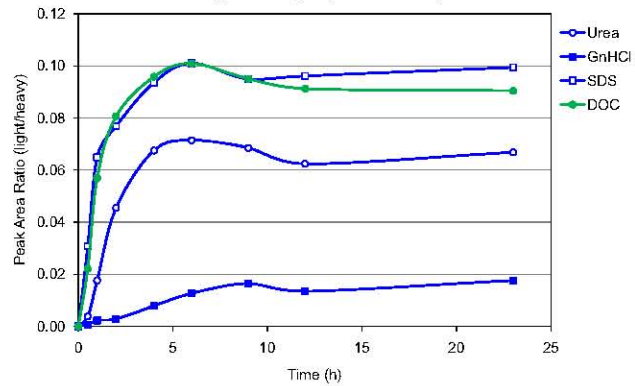

angiotensinogen (634.9 / 542.8)

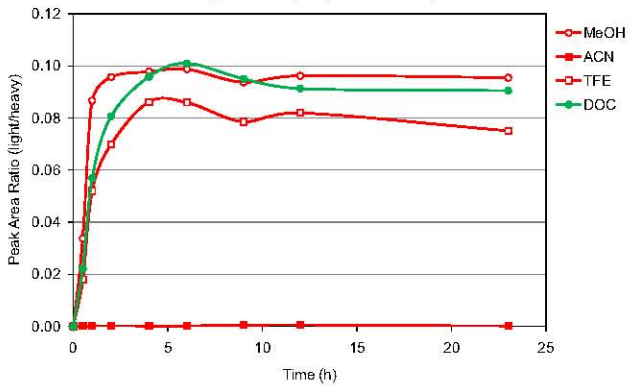

angiotensinogen (634.9 / 542.8)

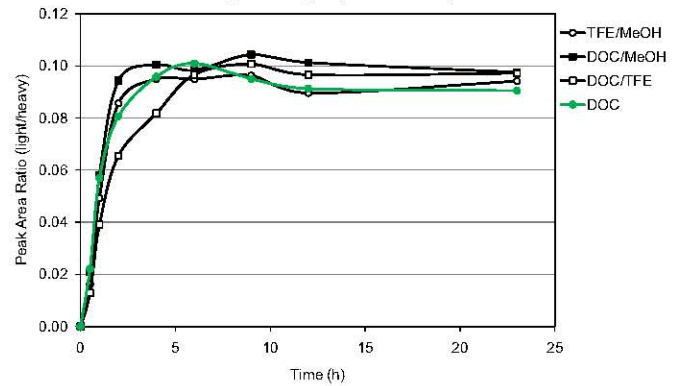

Peptide: DDLYVSDAFHK

Antithrombin-III (437.2 / 540.3)

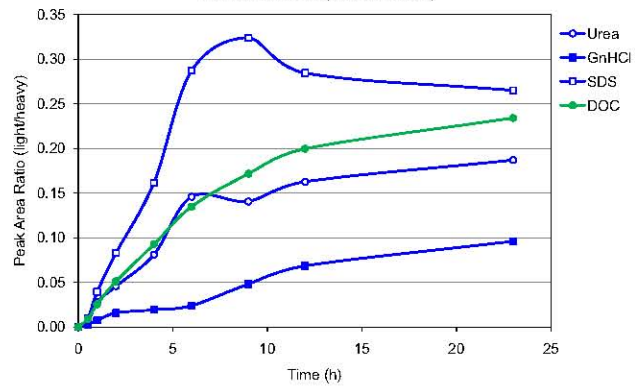

Antithrombin-III (437.2 / 540.3)

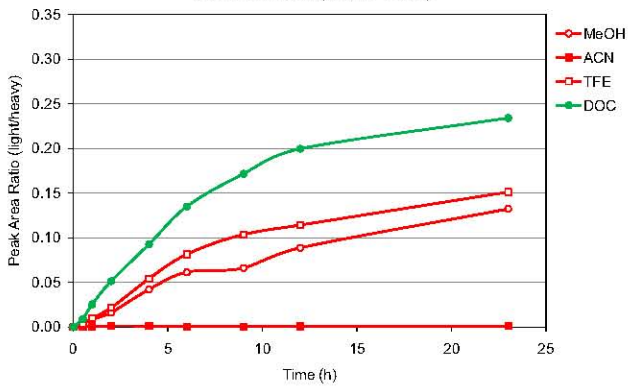

Antithrombin-III (437.2 / 540.3)

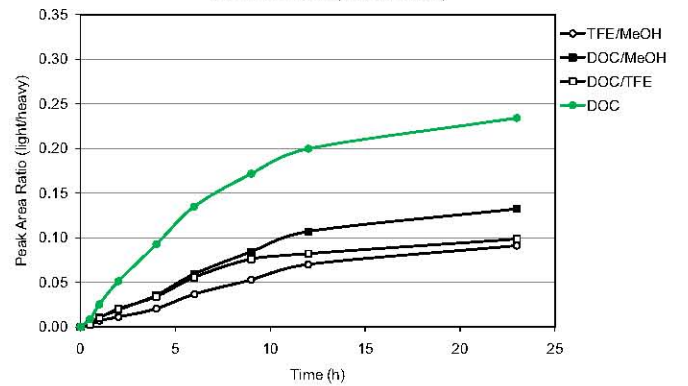

Peptide: ATEHLSTLSEK

Apolipoprotein A-I (405.9 / 522.3)

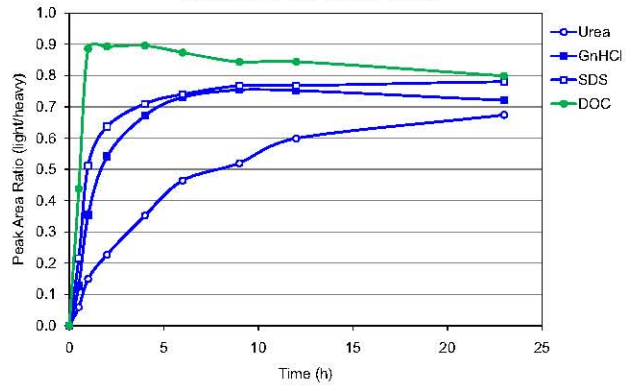

Apolipoprotein A-I (405.9 / 522.3)

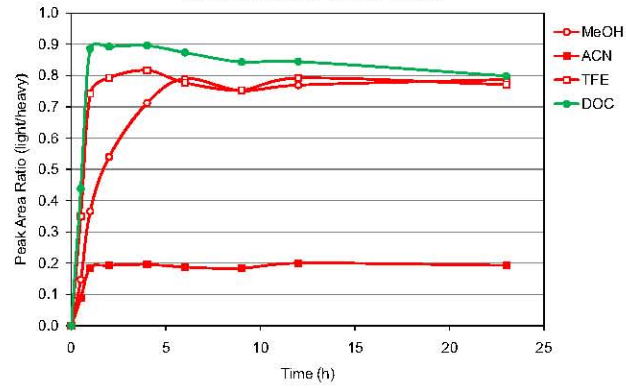

Apolipoprotein A-I (405.9 / 522.3)

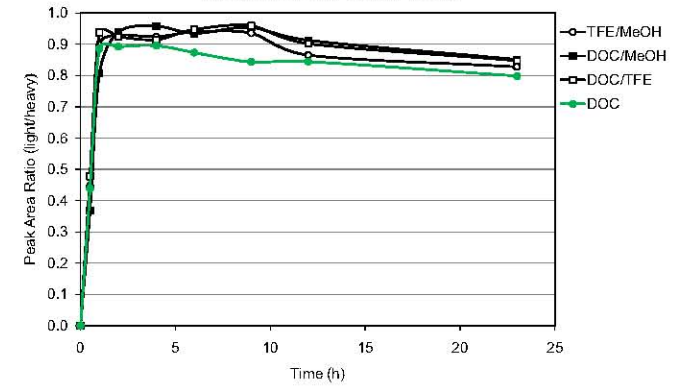

Peptide: SPELQAEAK

apolipoprotein A-II precursor (486.8 / 443.2)

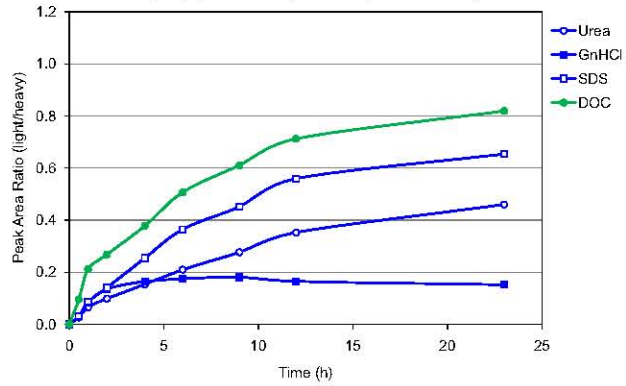

apolipoprotein A-II precursor (486.8 / 443.2)

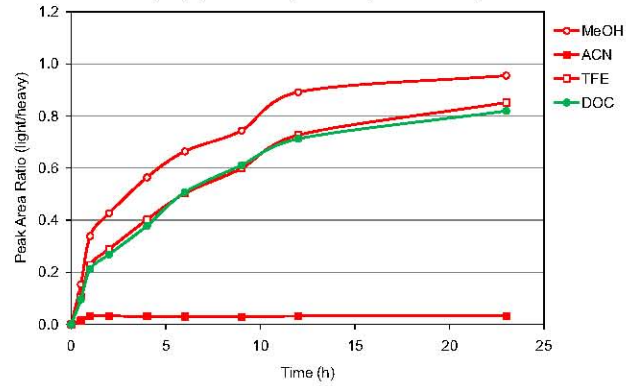

apolipoprotein A-II precursor (486.8 / 443.2)

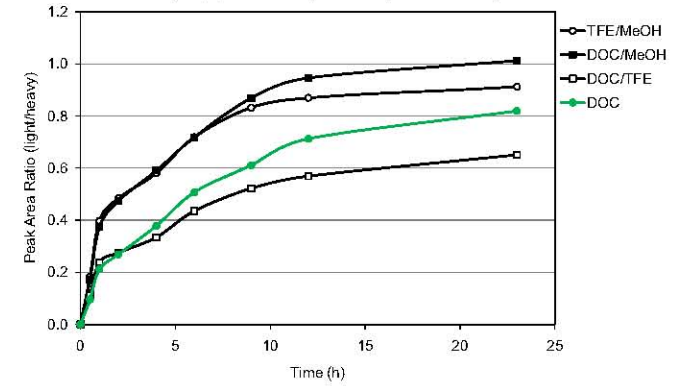

Peptide: SLAPYAQDTQEK

Apolipoprotein A-IV (675.8 / 540.3)

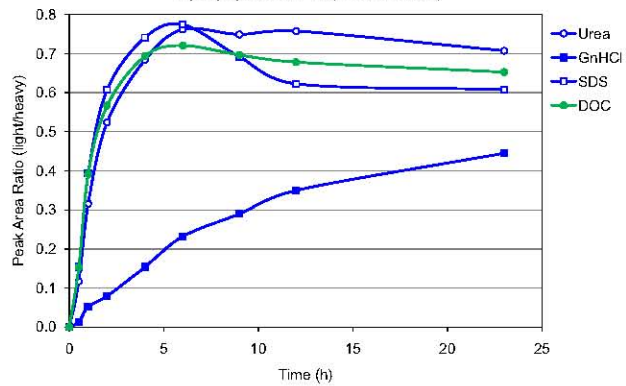

Apolipoprotein A-IV (675.8 / 540.3)

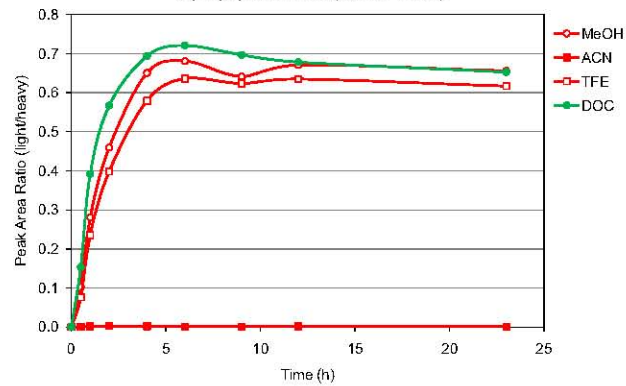

Apolipoprotein A-IV (675.8 / 540.3)

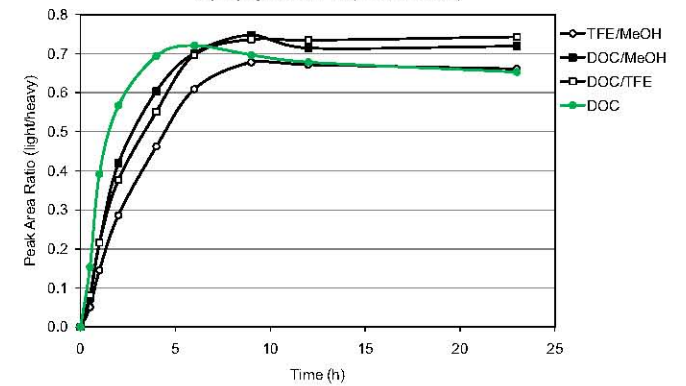

Peptide: FPEVDLTK

Apolipoprotein B-100 (524.3 / 450.8)

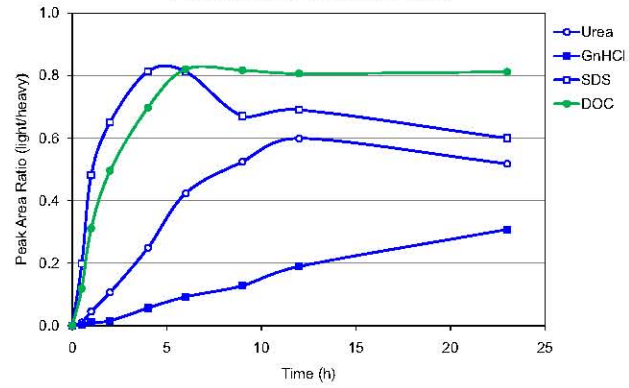

Apolipoprotein B-100 (524.3 / 450.8)

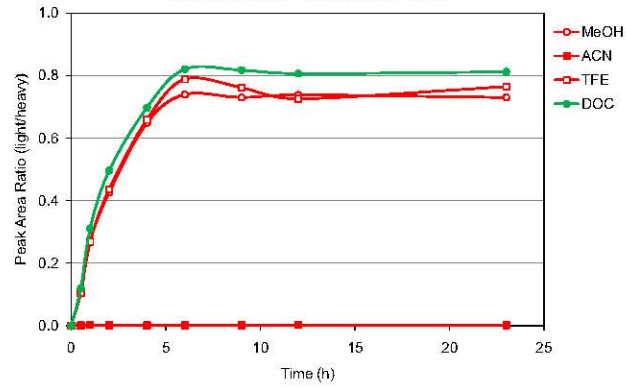

Apolipoprotein B-100 (524.3 / 450.8)

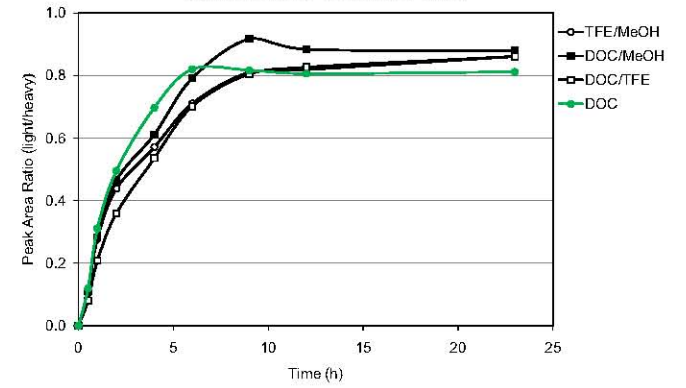

Peptide: TPDVSSALDK

Apolipoprotein C-I lipoprotein (516.8 / 466.2)

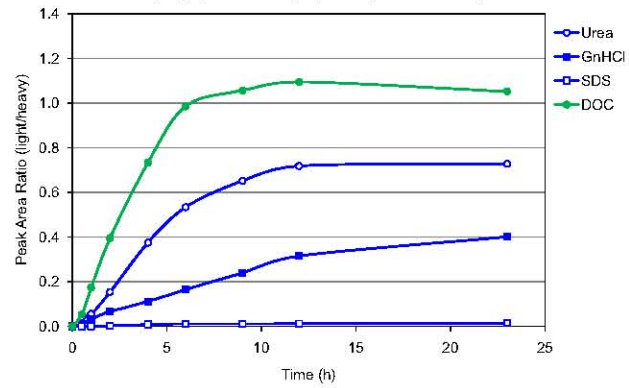

Apolipoprotein C-I lipoprotein (516.8 / 466.2)

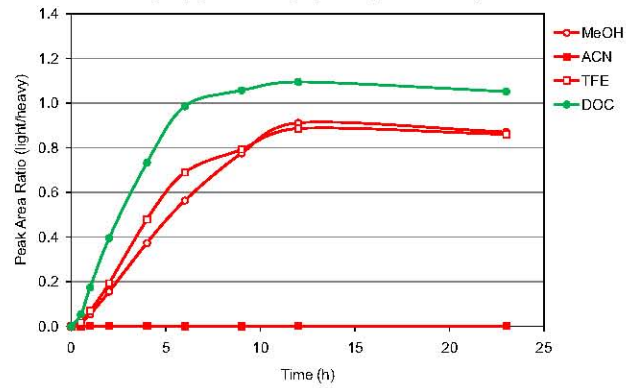

Apolipoprotein C-I lipoprotein (516.8 / 466.2)

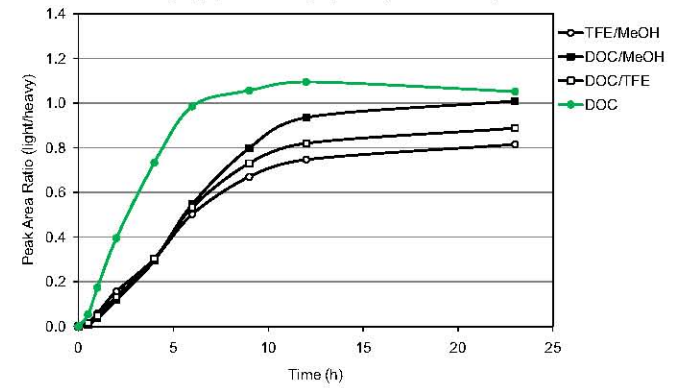

Peptide: GWVTDGFSSLK

Apolipoprotein C-III (598.8 / 854.4)

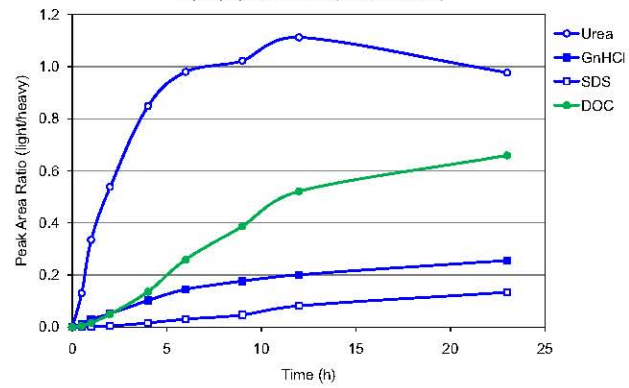

Apolipoprotein C-III (598.8 / 854.4)

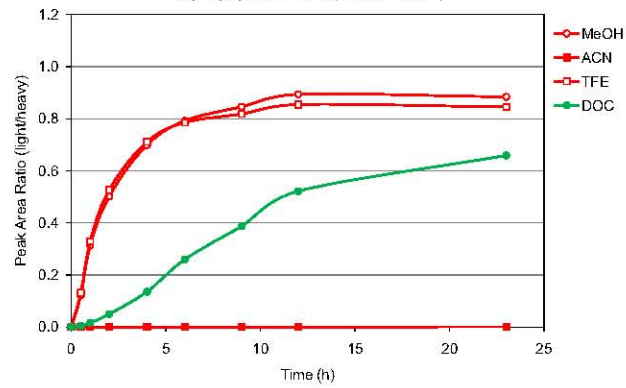

Apolipoprotein C-III (598.8 / 854.4)

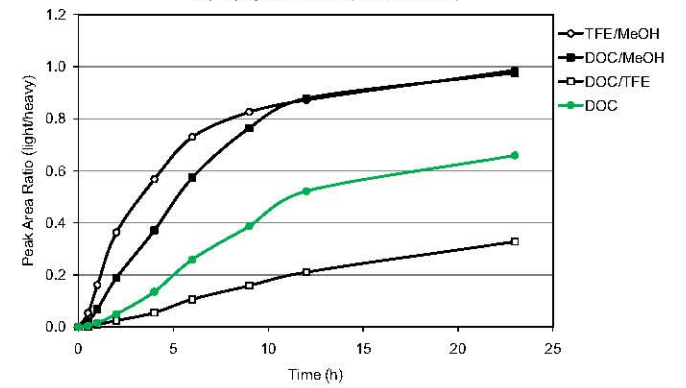

Peptide: LGPLVEQGR

Apolipoprotein E (484.8 / 399.7)

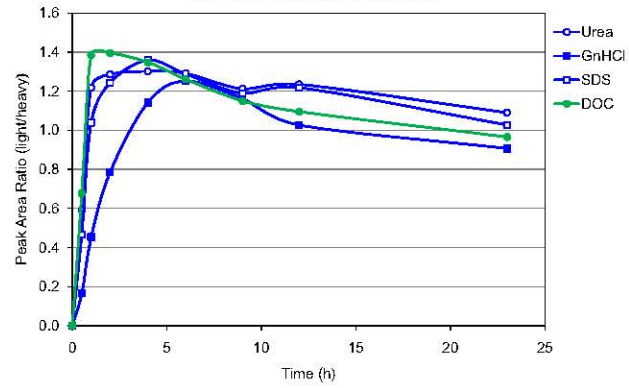

Apolipoprotein E (484.8 / 399.7)

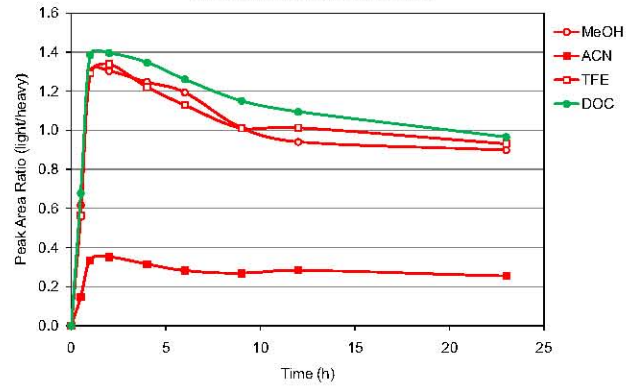

Apolipoprotein E (484.8 / 399.7)

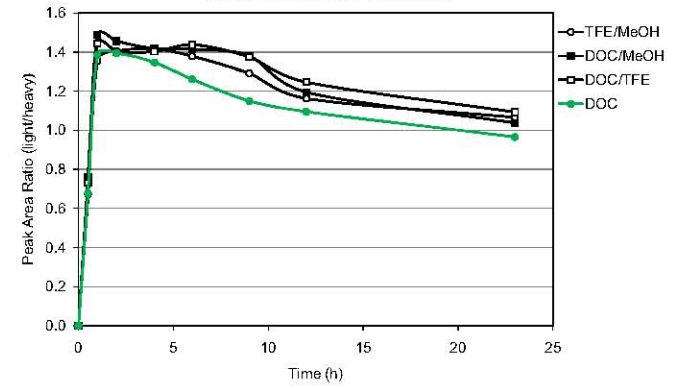

Peptide: ATVVYQGER

Beta-2-glycoprotein I (511.8 / 751.4)

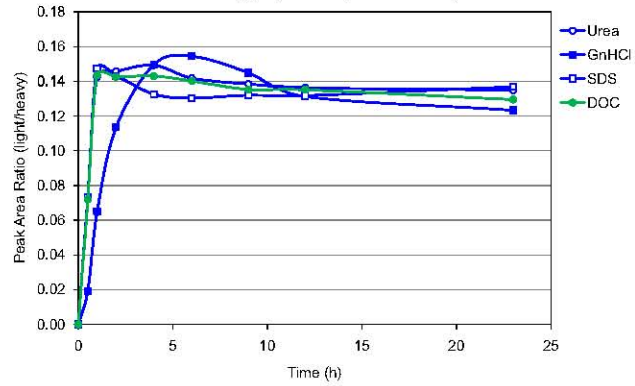

Beta-2-glycoprotein I (511.8 / 751.4)

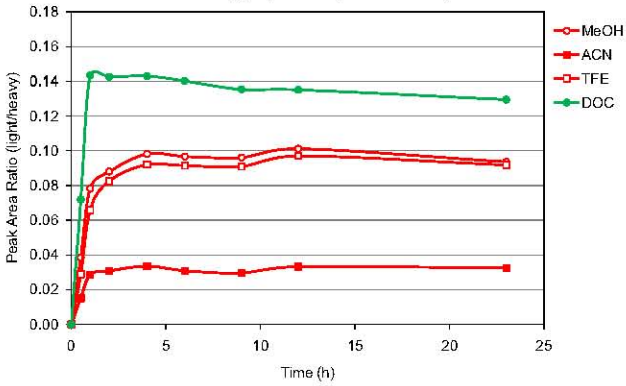

Beta-2-glycoprotein I (511.8 / 751.4)

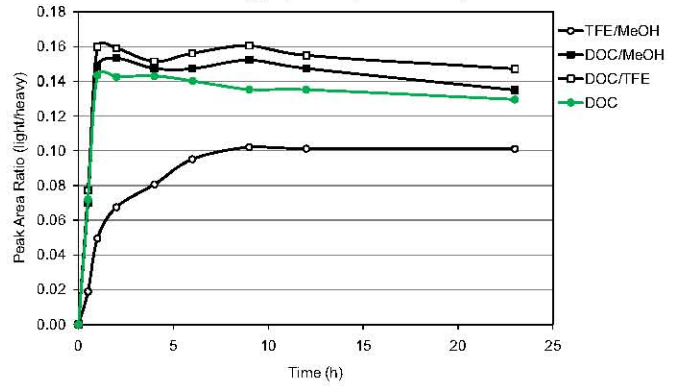

Peptide: EYTDASFTNR

Ceruloplasmin (602.3 / 624.3)

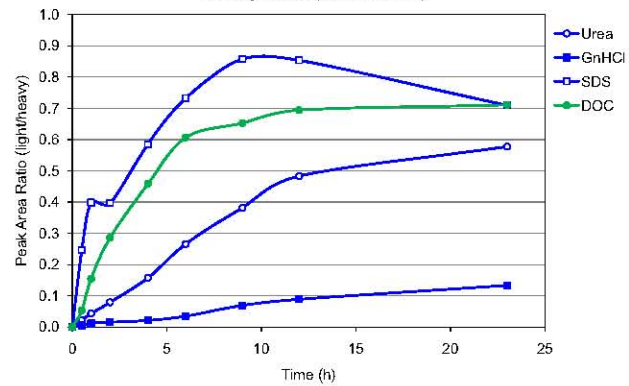

Ceruloplasmin (602.3 / 624.3)

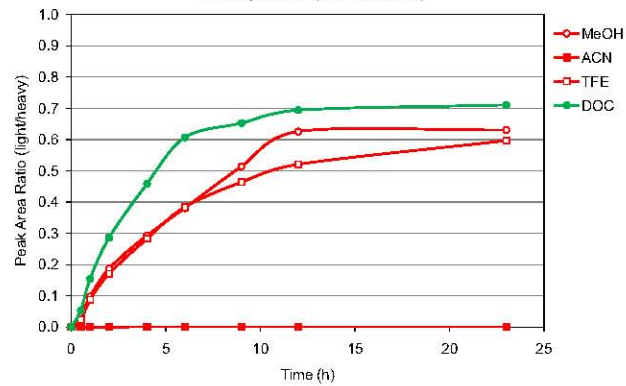

Ceruloplasmin (602.3 / 624.3)

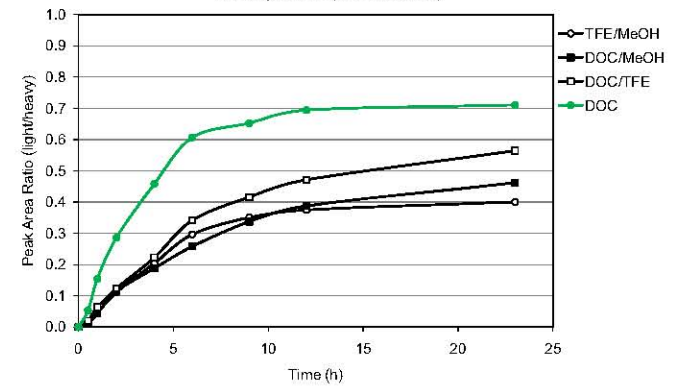

Peptide: ELDESLQVAER

Clusterin (644.8 / 602.3)

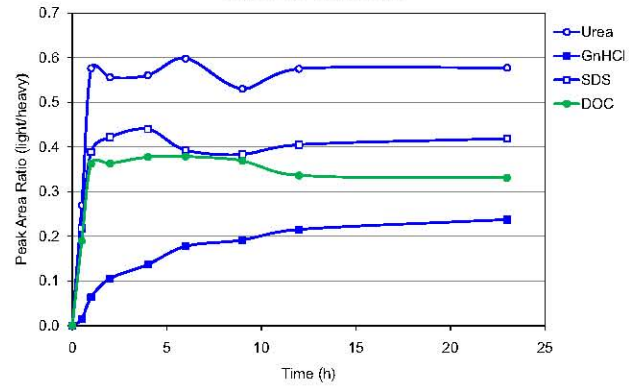

Clusterin (644.8 / 602.3)

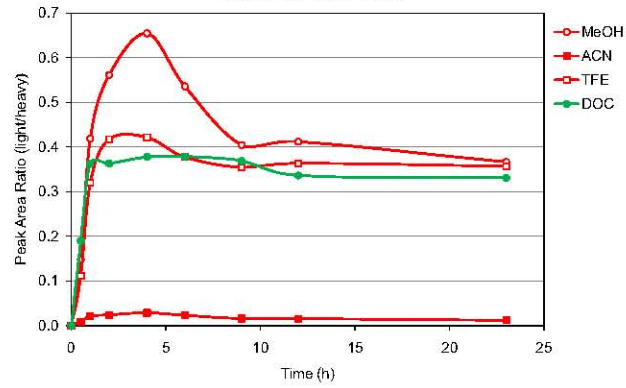

Clusterin (644.8 / 602.3)

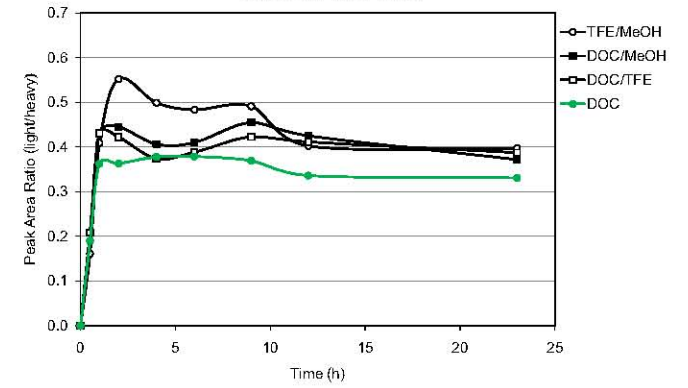

Peptide: VVGGLVALR

Coagulation factor XIIa heavy chain (442.3 / 685.4)

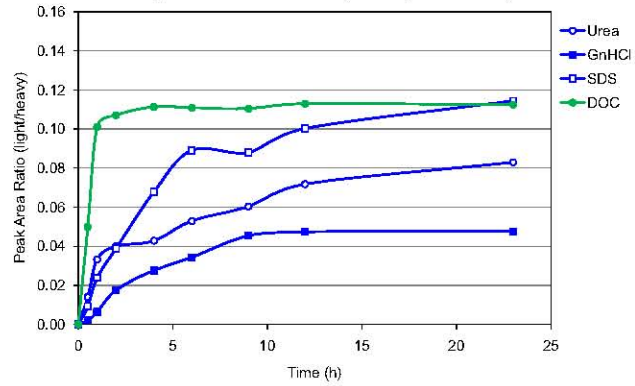

Coagulation factor XIIa heavy chain (442.3 / 685.4)

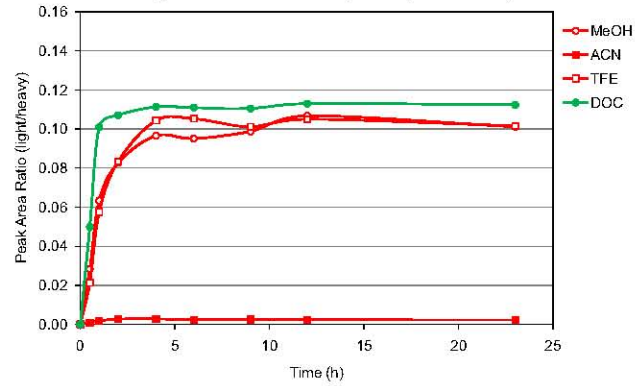

Coagulation factor XIIa heavy chain (442.3 / 685.4)

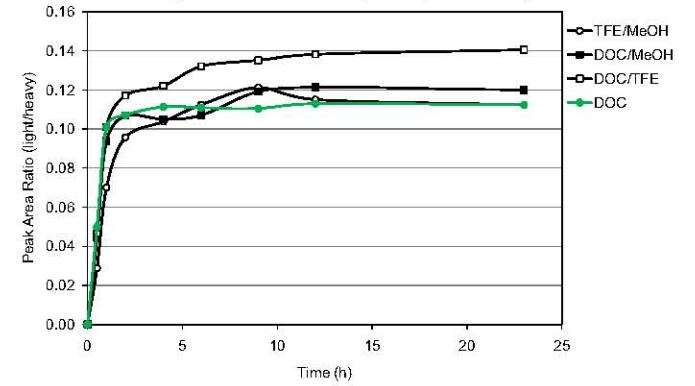

Peptide: TGLQEVEVK

Complement C3 (501.8 / 731.4)

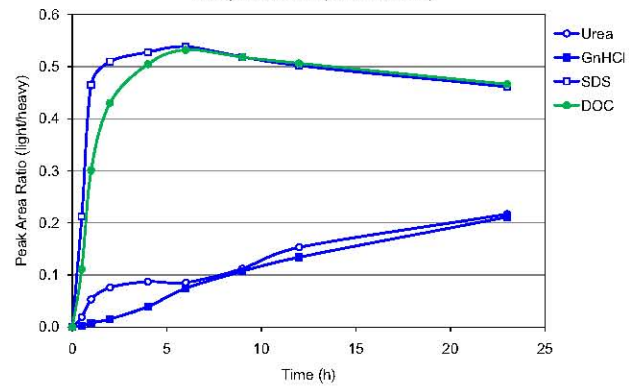

Complement C3 (501.8 / 731.4)

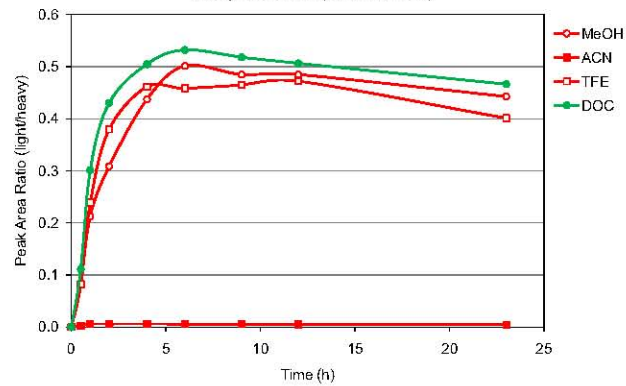

Complement C3 (501.8 / 731.4)

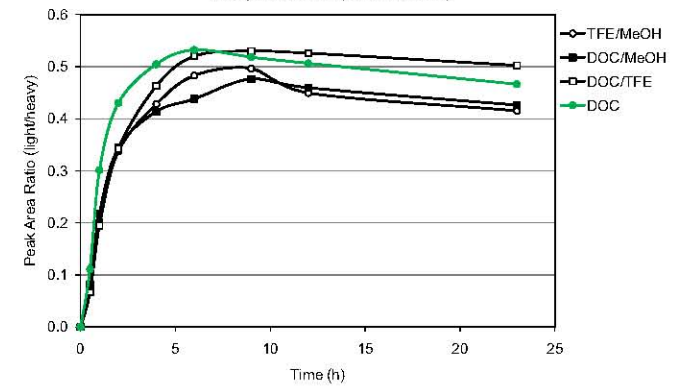

Peptide: VGDTLNLNLR

Complement C4 beta chain (557.8 / 629.4)

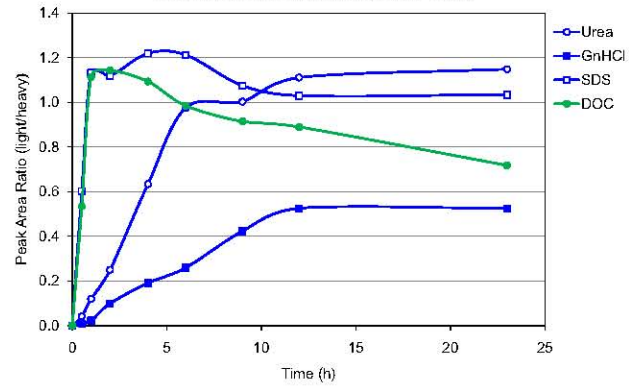

Complement C4 beta chain (557.8 / 629.4)

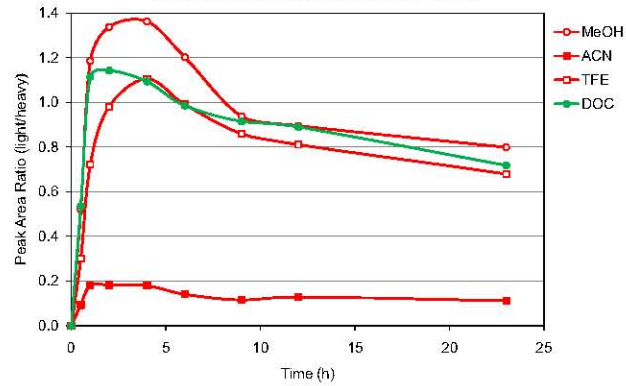

Complement C4 beta chain (557.8 / 629.4)

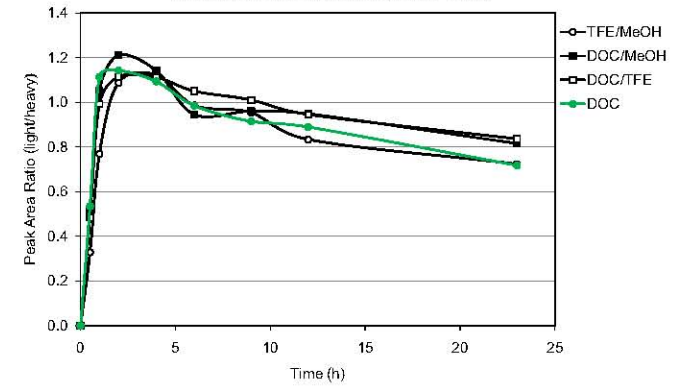

Peptide: ITQVLHFTK

Complement C4 gamma chain (362.9 / 487.3)

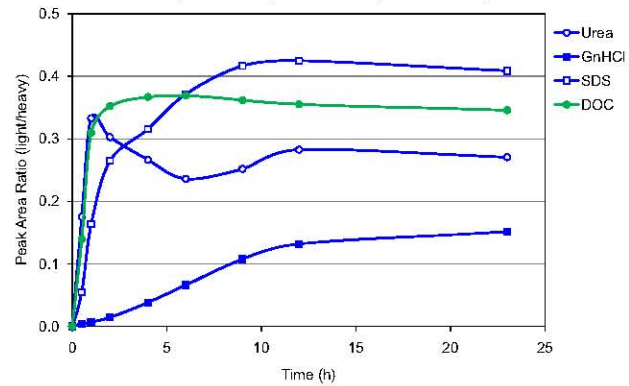

Complement C4 gamma chain (362.9 / 487.3)

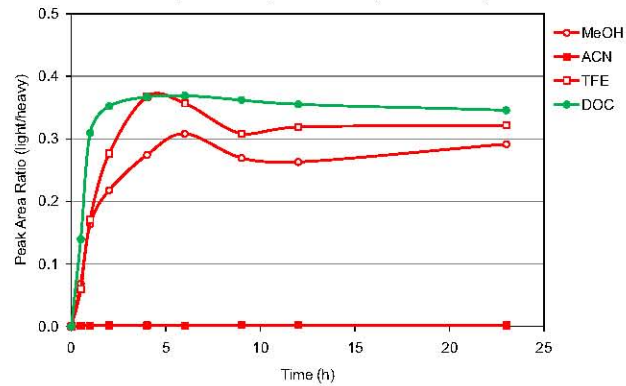

Complement C4 gamma chain (362.9 / 487.3)

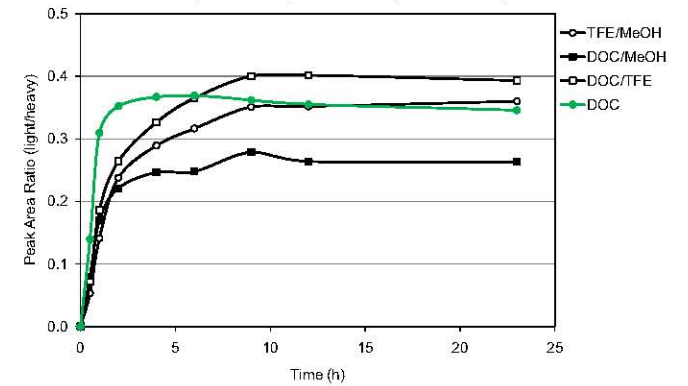

Peptide: TEHYEEQIEAFK

Complement component C9 (508.6 / 494.3)

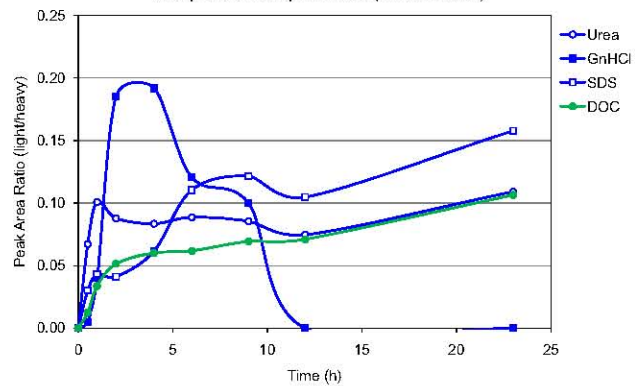

Complement component C9 (508.6 / 494.3)

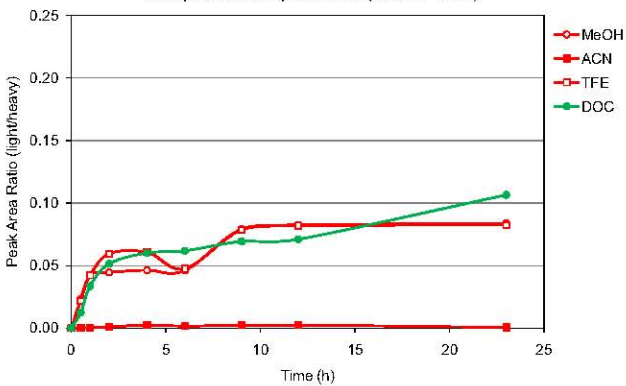

Complement component C9 (508.6 / 494.3)

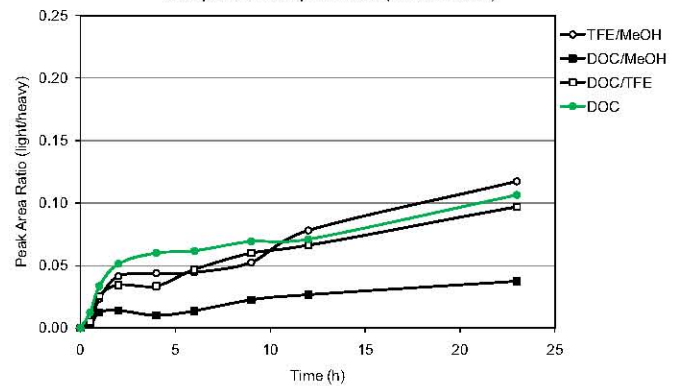



Peptide: EELLPAQDIK

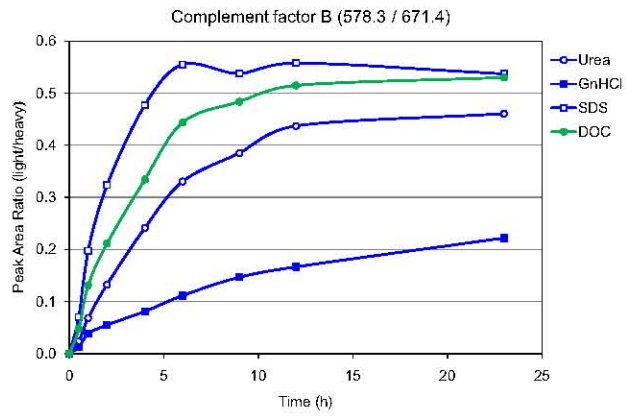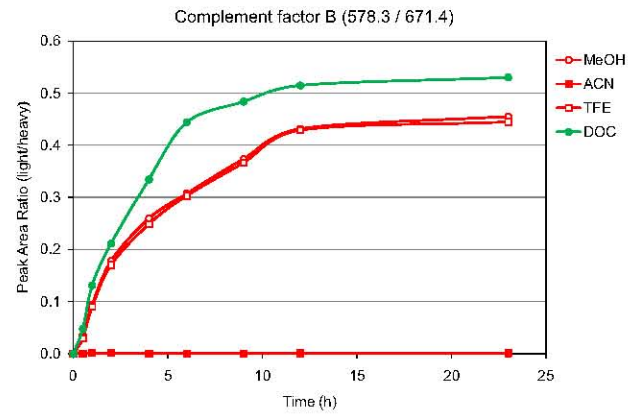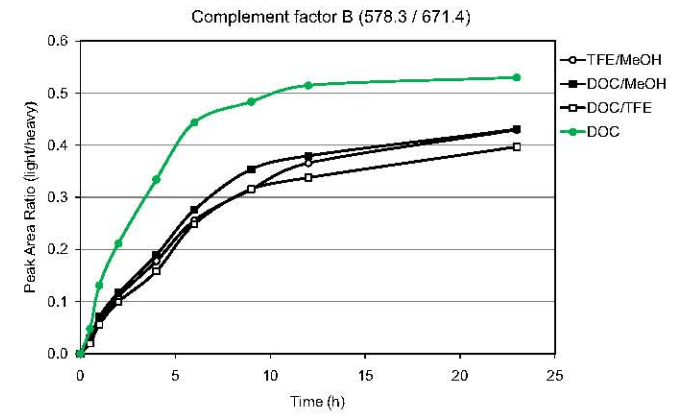

Peptide: SPDVINGSPISQK

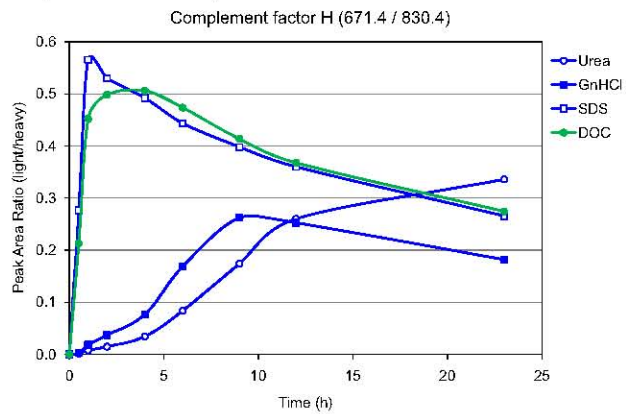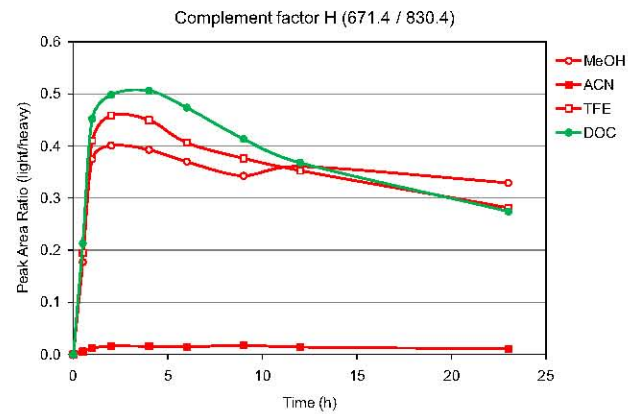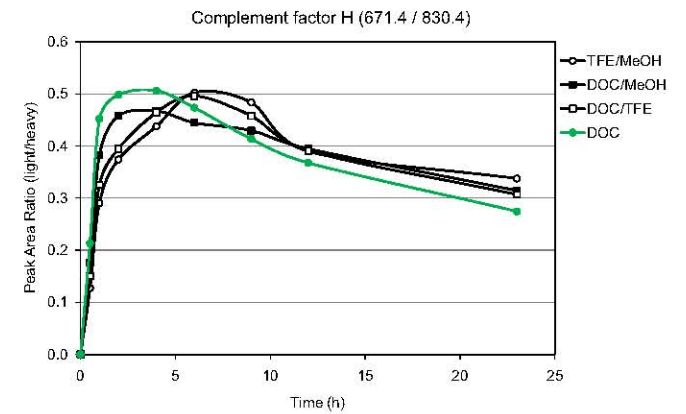

Peptide: GSESGIFTNTK

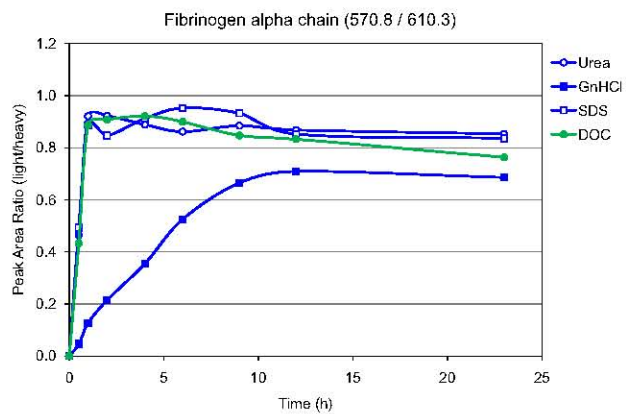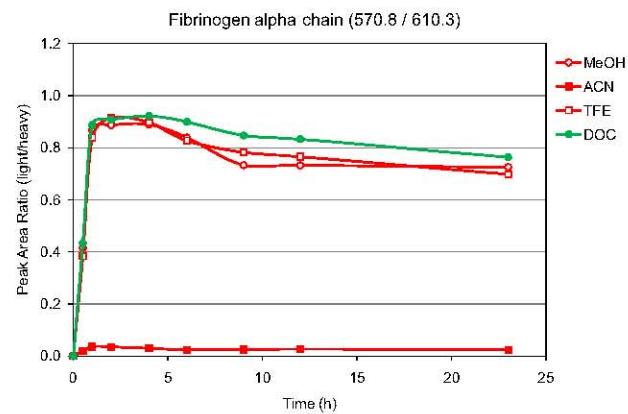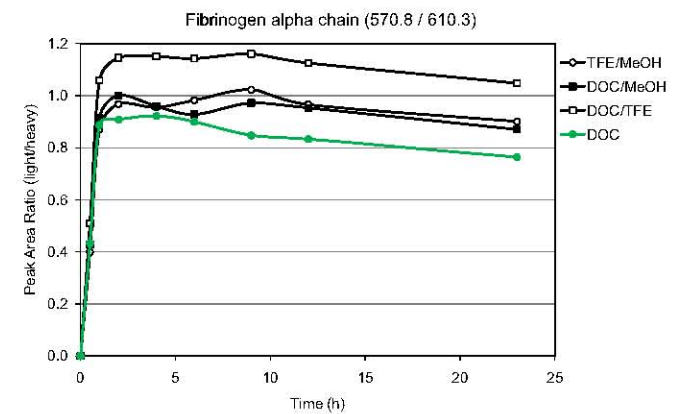

Peptide: QGFGNVATNTD GK

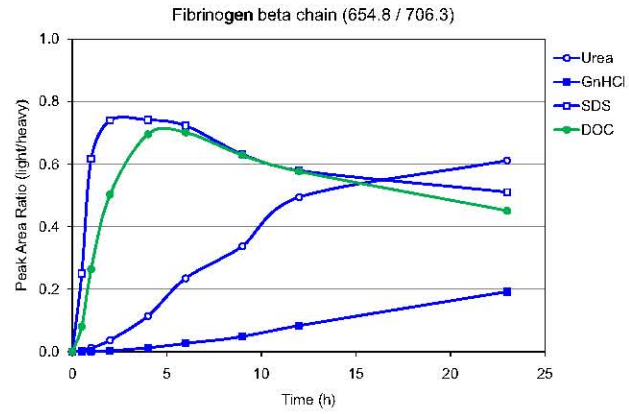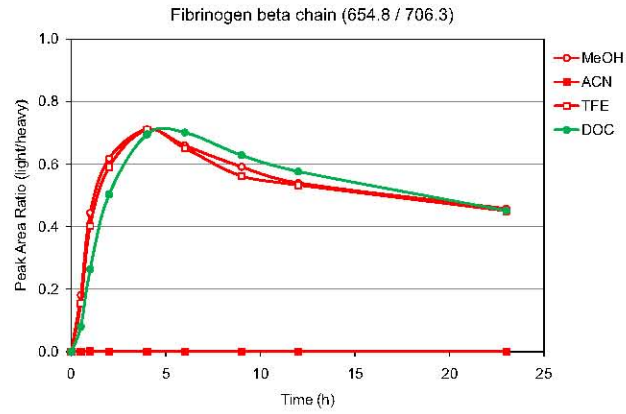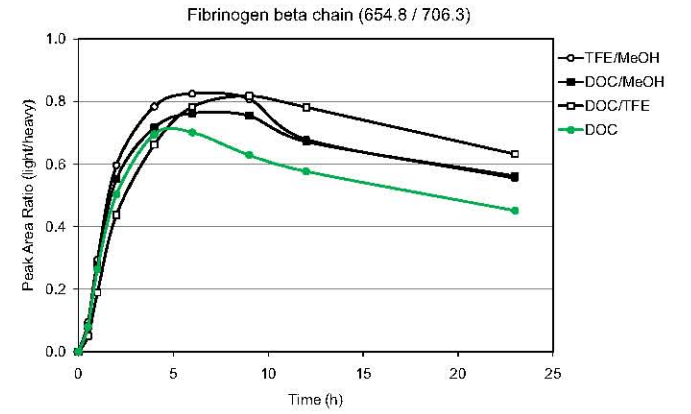

Peptide: DTVQIHDITGK

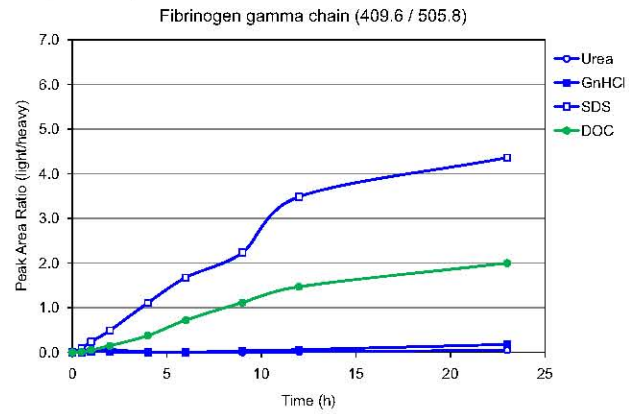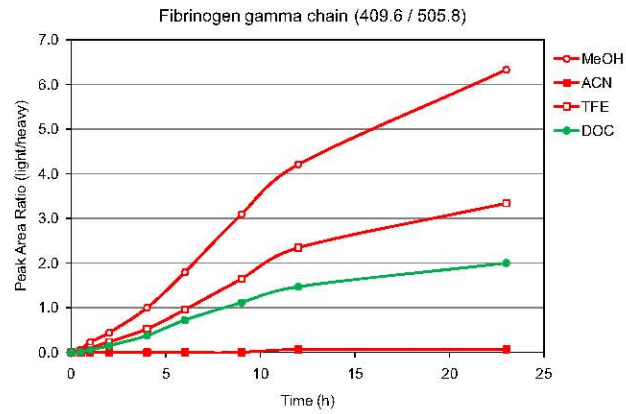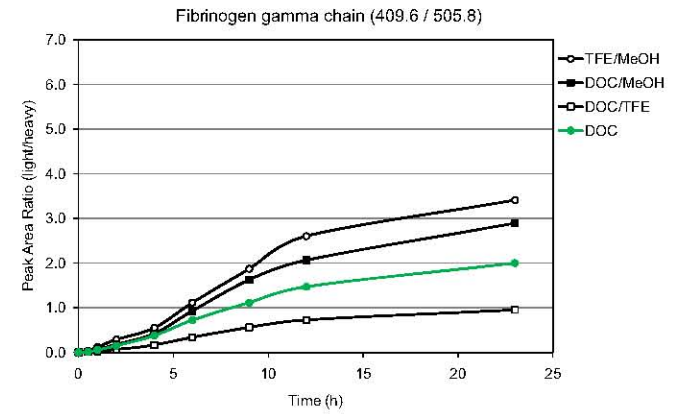

Peptide: TGAQELLR

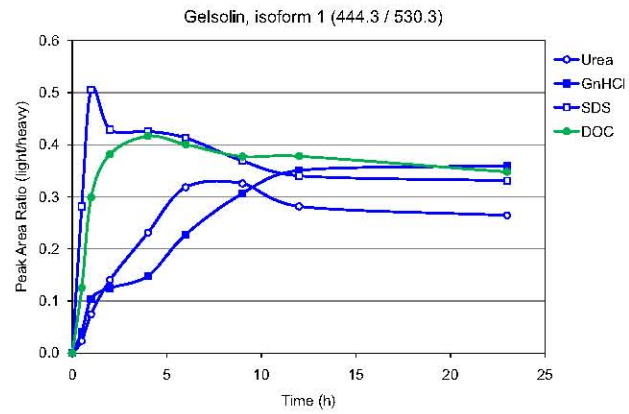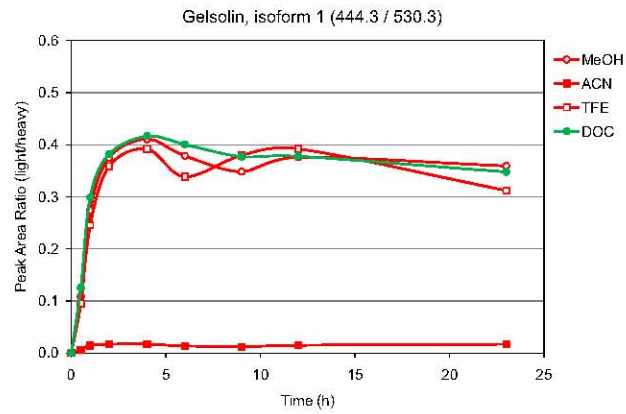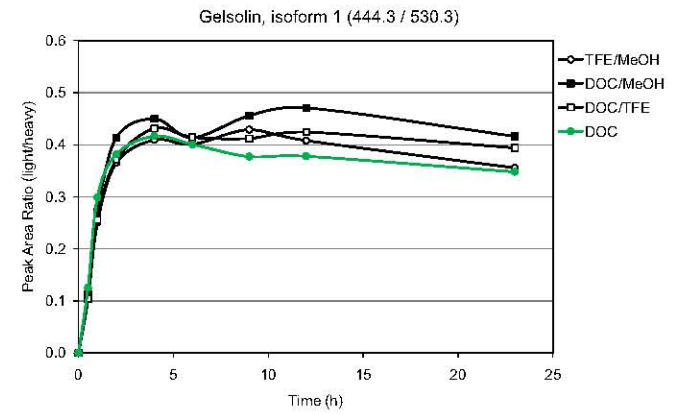

Peptide: VGYVSGWGR

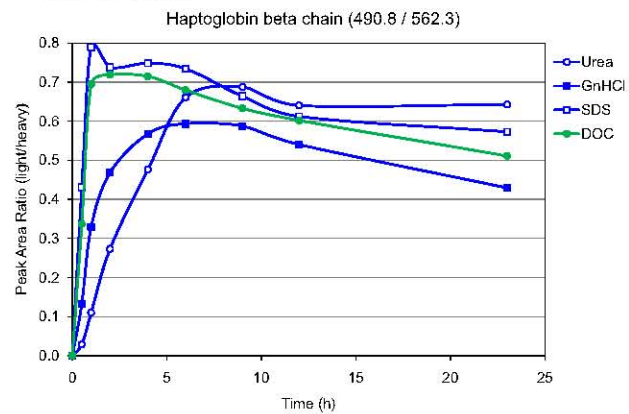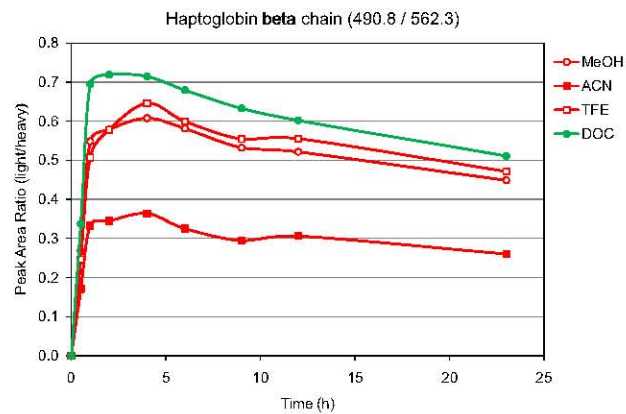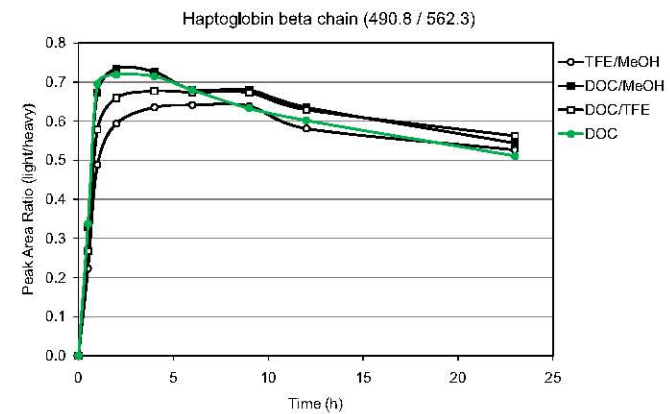

Peptide: NFPSVDAAFR

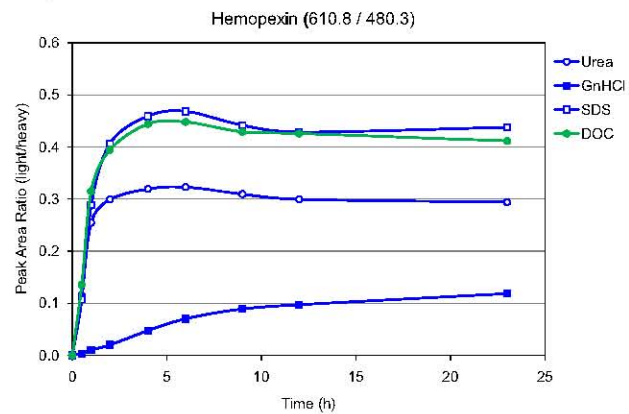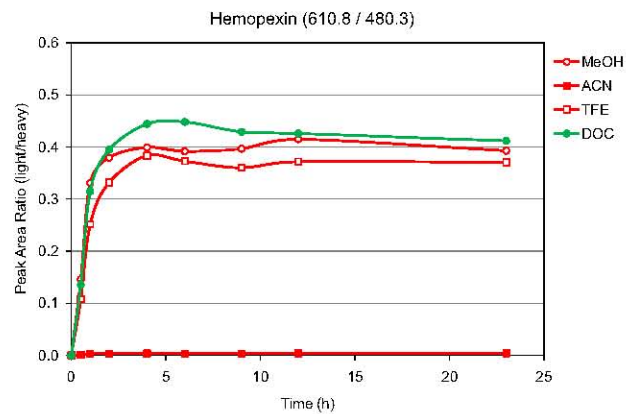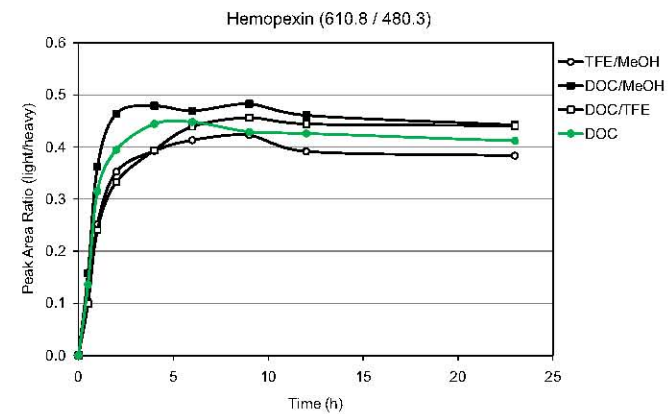

Peptide: TLEAQLTPR

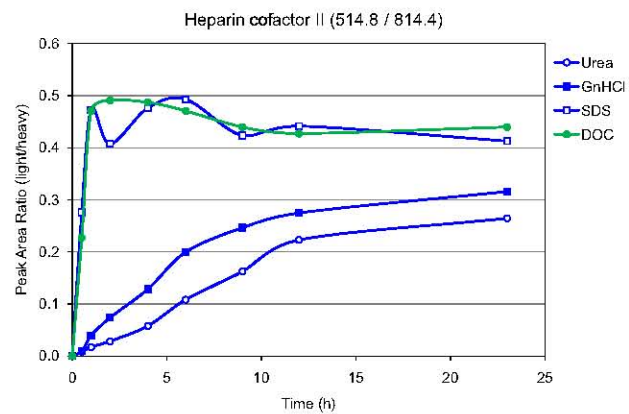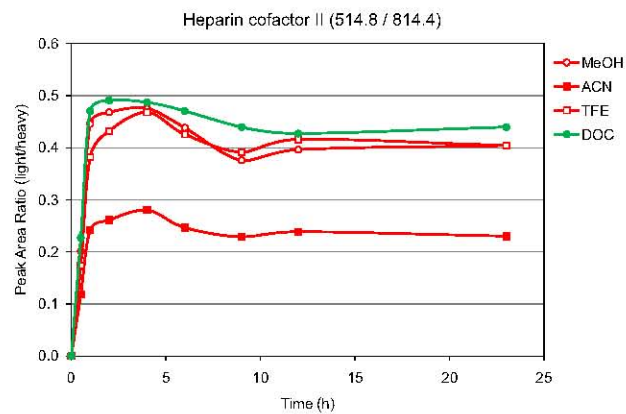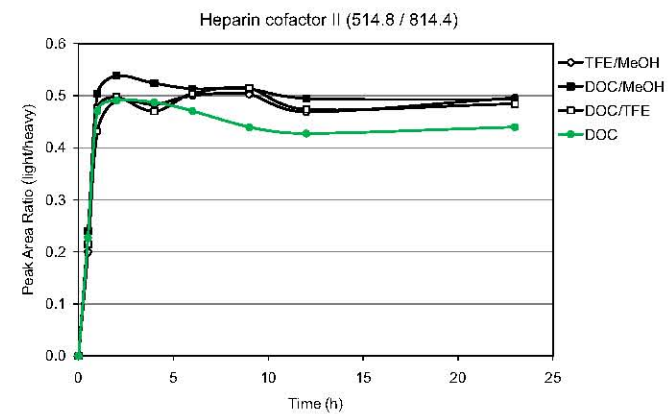

Peptide: AAISGENAGLVR

Inter-alpha-trypsin inhibitor HC (579.3 / 902.5)

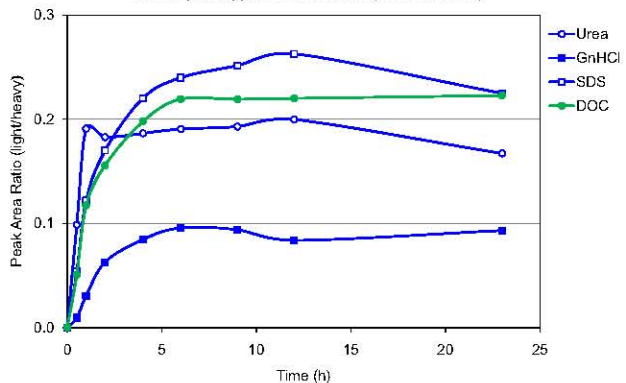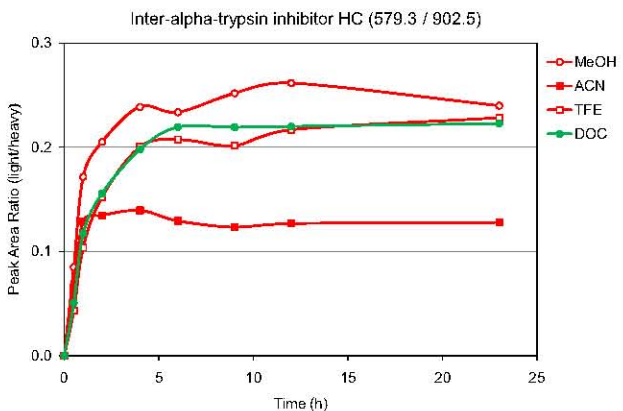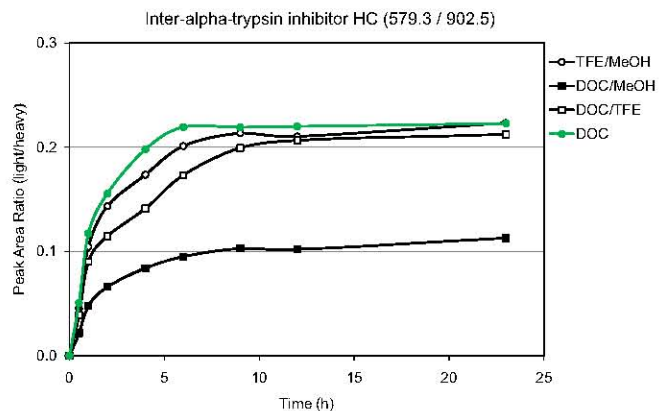

Peptide: TVGSDTFYSFK

Kininogen-1 (626.3 / 1051.5)

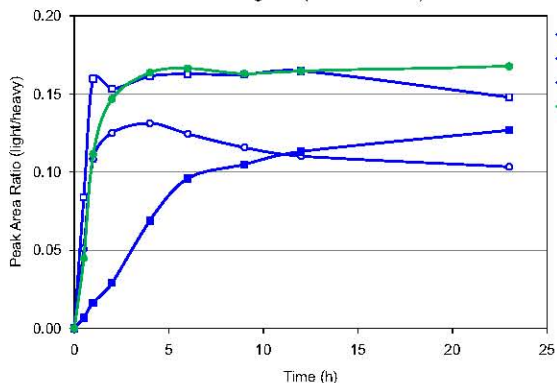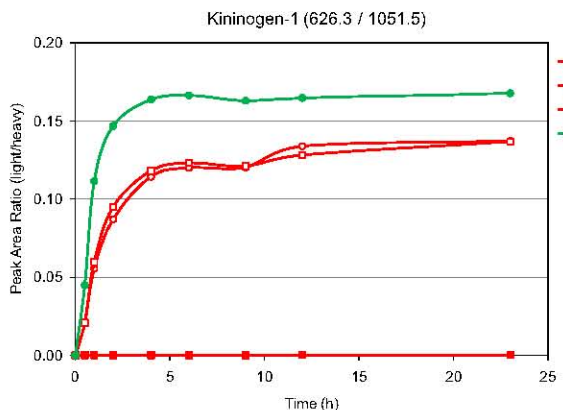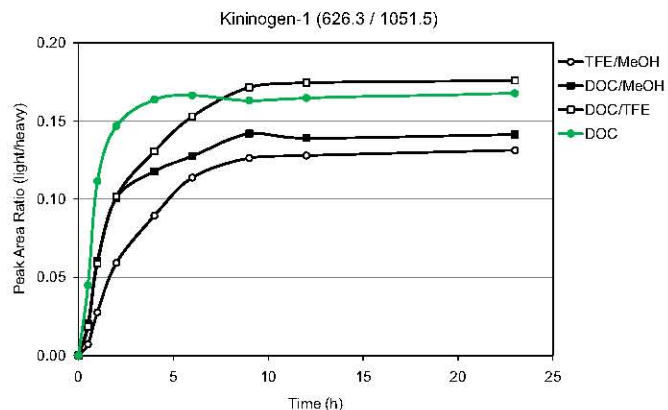

Peptide: AEIEYLEK

L-selectin (497.8 / 794.4)

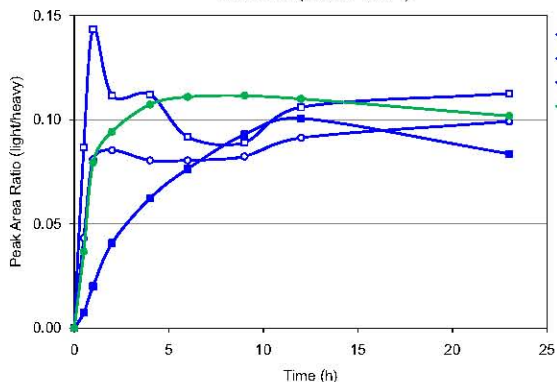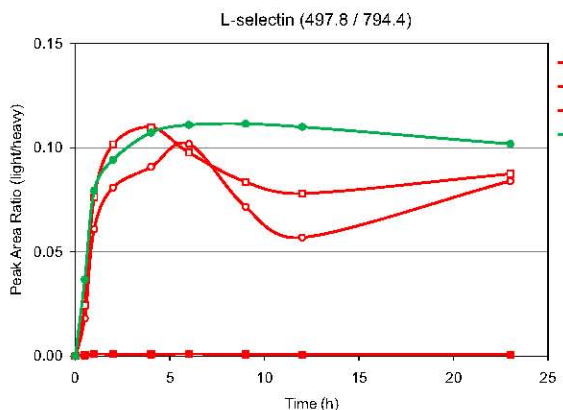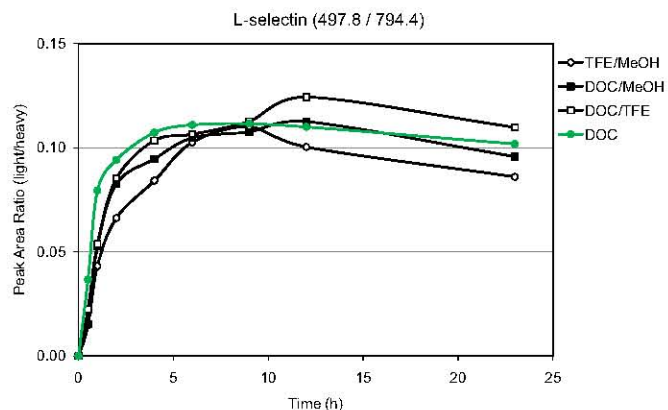

Peptide: YWGVASFLQK

Plasma retinol-binding protein precursor (599.8 / 693.4)

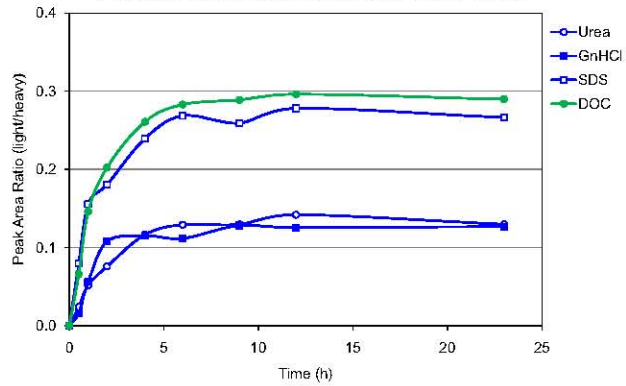

Plasma retinol-binding protein precursor (599.8 / 693.4)

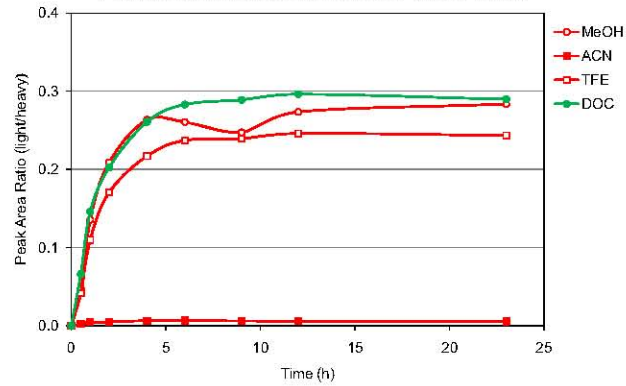

Plasma retinol-binding protein precursor (599.8 / 693.4)

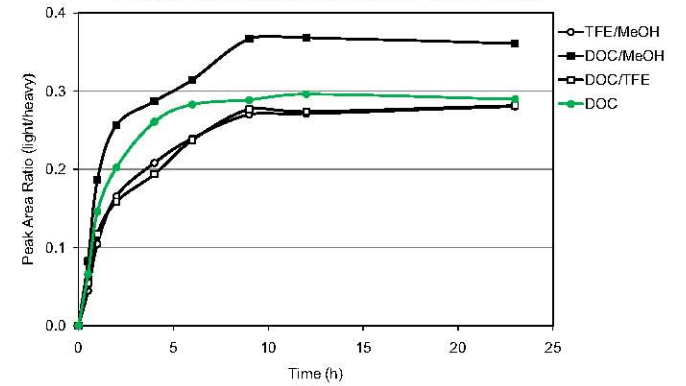

Peptide: LFLEPTR

Plasminogen (438.3 / 615.3)

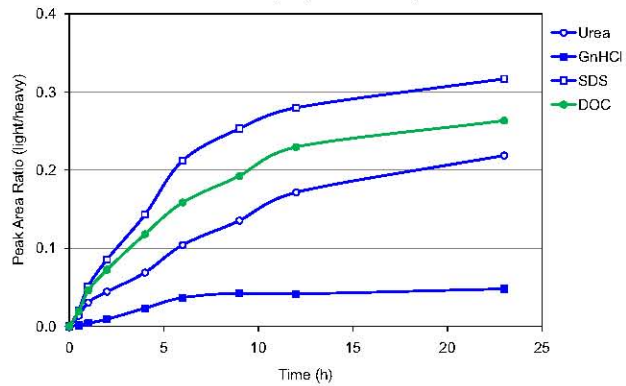

Plasminogen (438.3 / 615.3)

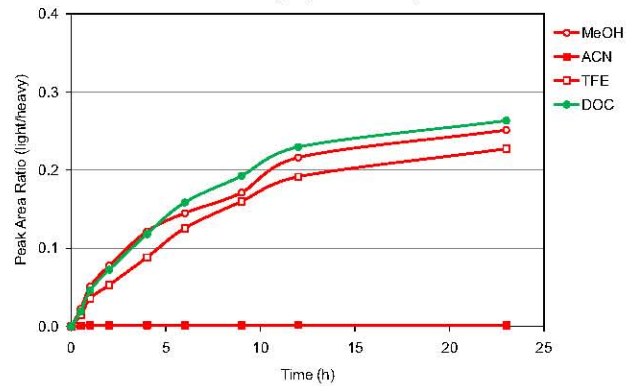

Plasminogen (438.3 / 615.3)

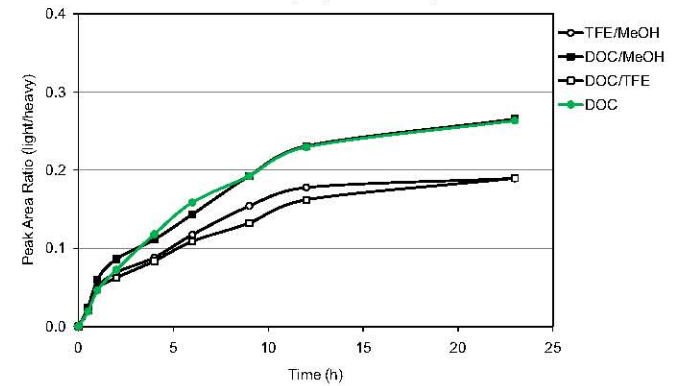

Peptide: ETAASLLQAGYK

Prothrombin (626.3 / 879.5)

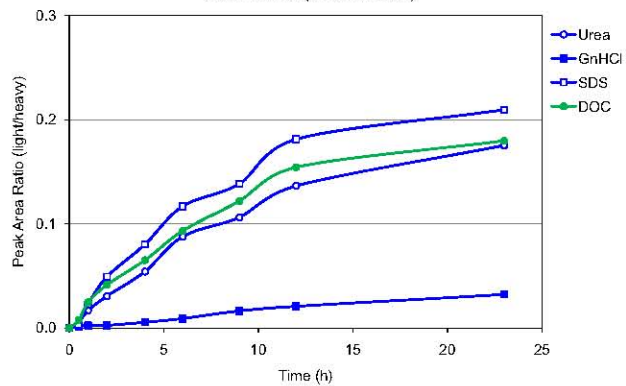

Prothrombin (626.3 / 879.5)

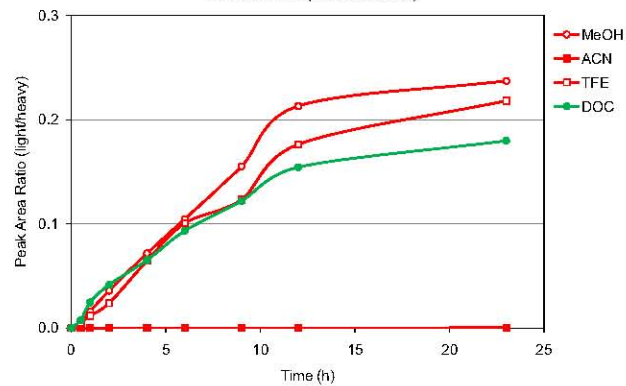

Prothrombin (626.3 / 879.5)

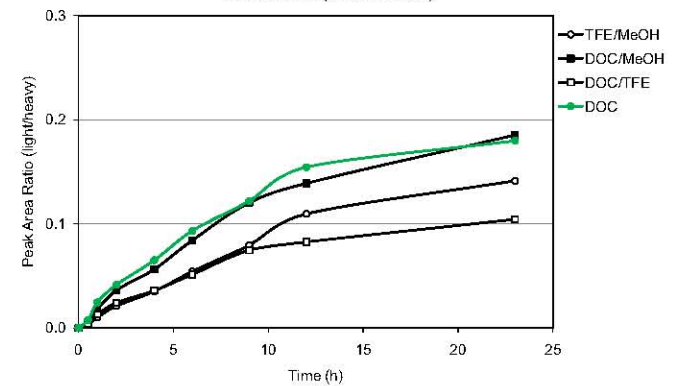

Peptide: VGEYSLYIGR

Serum amyloid P-component (578.8 / 708.4)

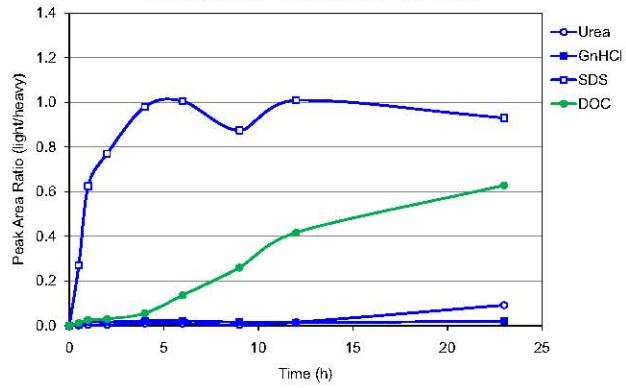

Serum amyloid P-component (578.8 / 708.4)

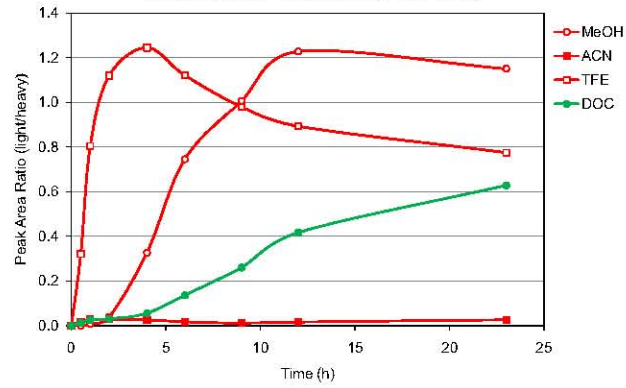

Serum amyloid P-component (578.8 / 708.4)

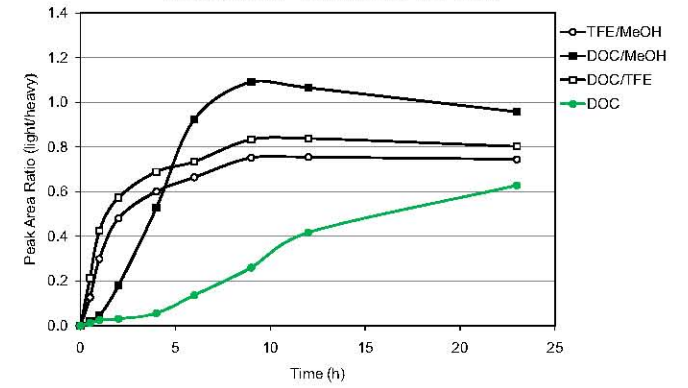

Peptide: EDPQTFYYAVAVVK

Transferrin (815.4 / 693.4)

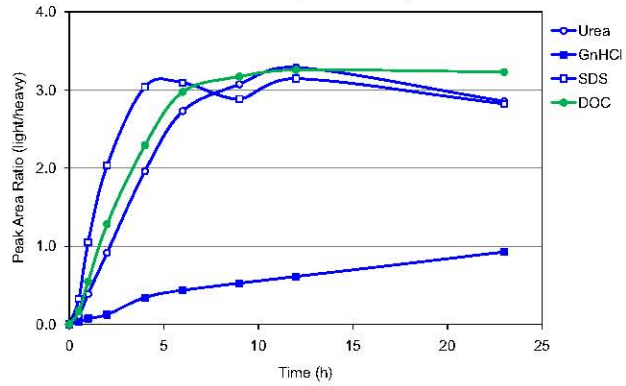

Transferrin (815.4 / 693.4)

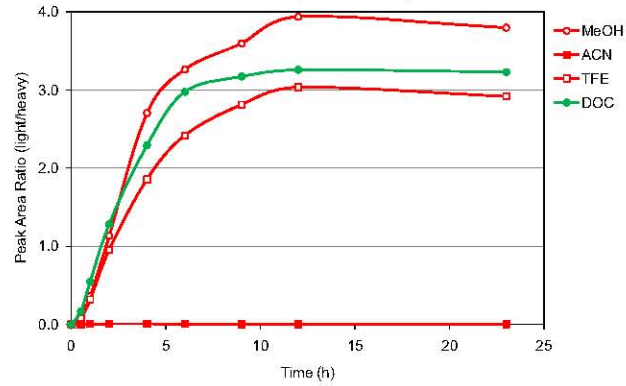

Transferrin (815.4 / 693.4)

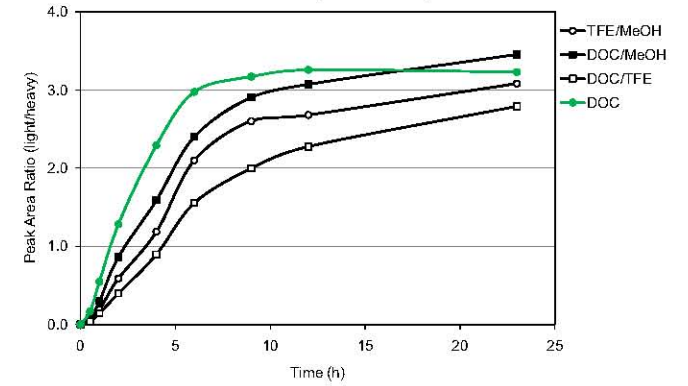

Peptide: AADDTWEPFASGK

Transthyretin (697.8 / 606.3)

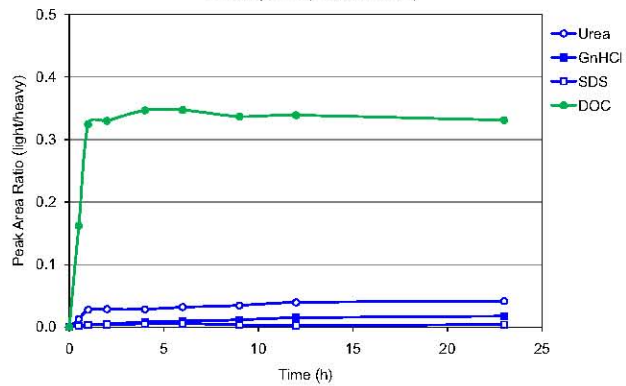

Transthyretin (697.8 / 606.3)

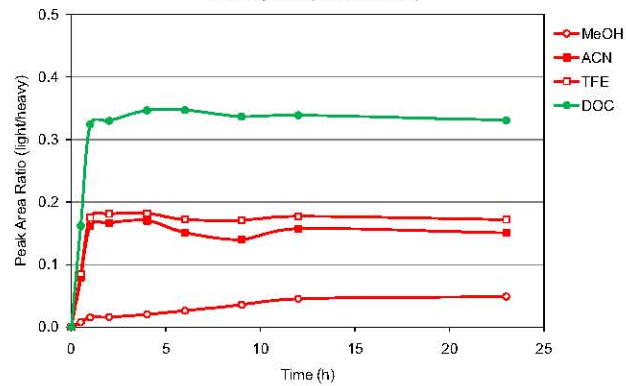

Transthyretin (697.8 / 606.3)

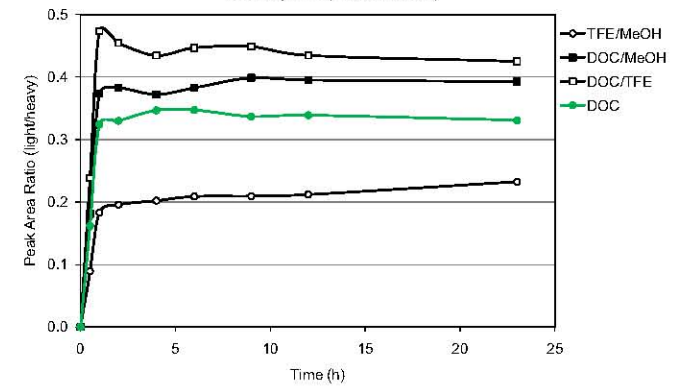

Peptide: THLPEVFLSK

Vitamin D-binding protein (390.9 / 494.3)

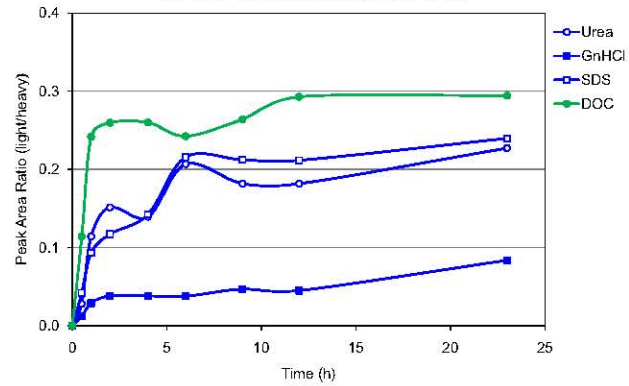

Vitamin D-binding protein (390.9 / 494.3)

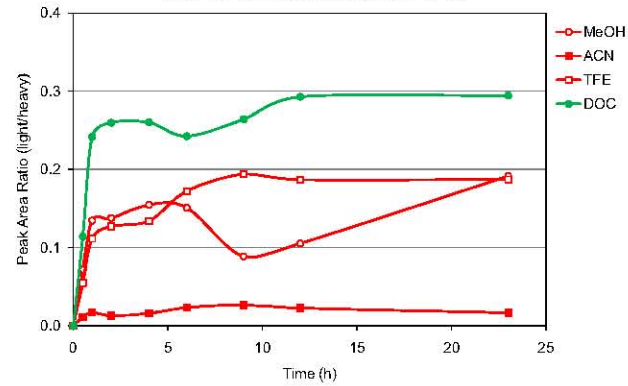

Vitamin D-binding protein (390.9 / 494.3)

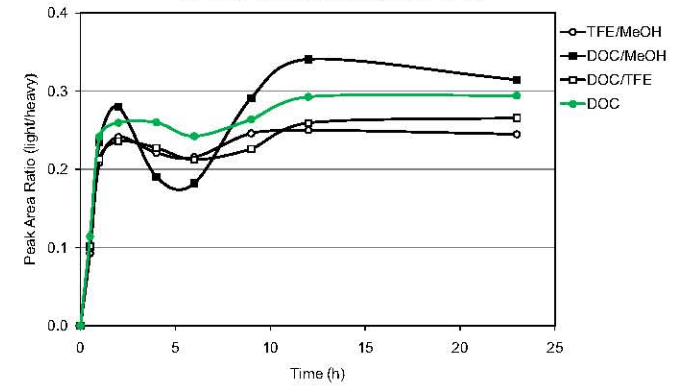

Peptide: FEDGVLPDPYPR

Vitronectin (711.8 / 647.3)

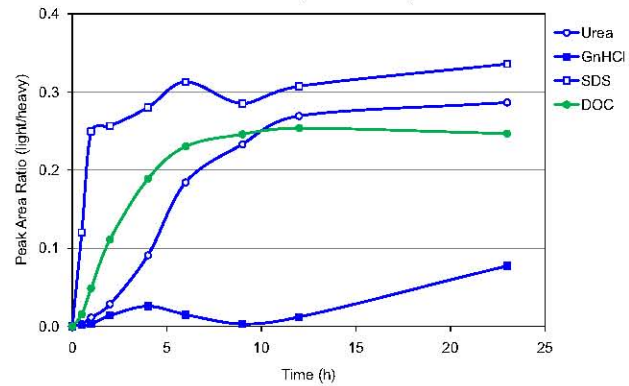

Vitronectin (711.8 / 647.3)

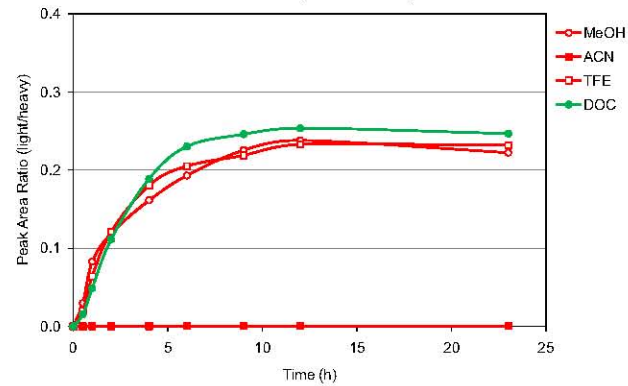

Vitronectin (711.8 / 647.3)

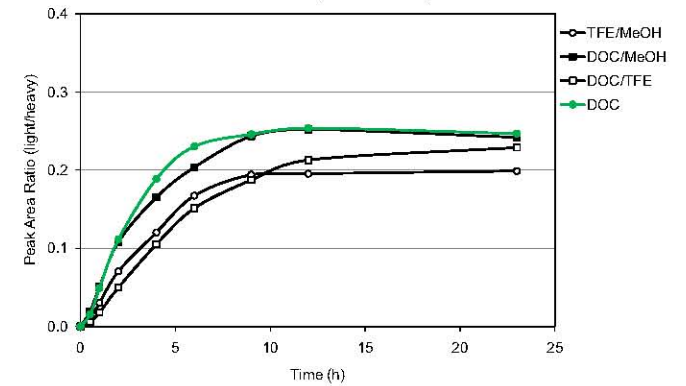

Peptide: EIPAWVPDPAQITK

Zinc-alpha-2-glycoprotein (892.0 / 770.9)

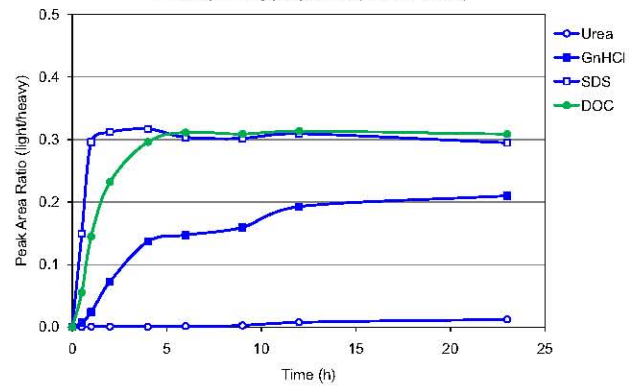

Zinc-alpha-2-glycoprotein (892.0 / 770.9)

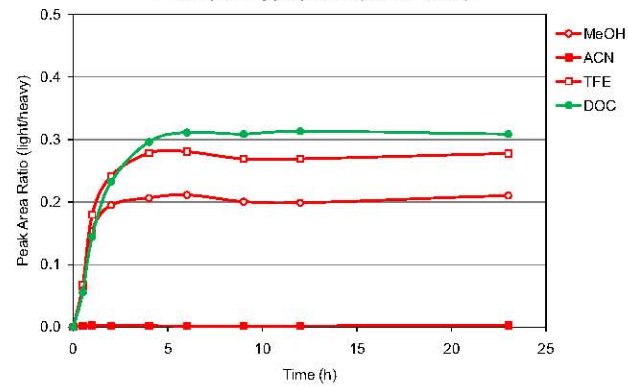

Zinc-alpha-2-glycoprotein (892.0 / 770.9)

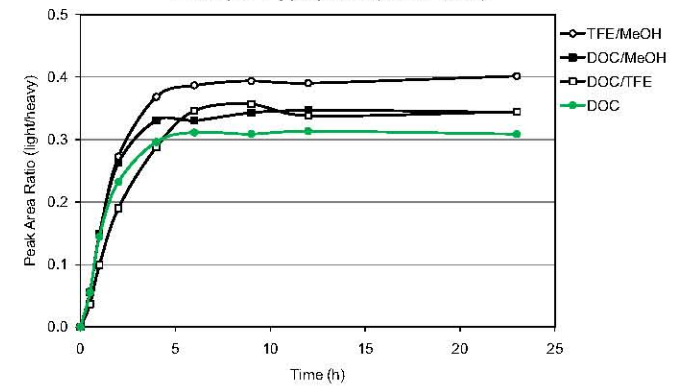

Supplement: NIHMS241674-supplement-Suppl_Figure_1.pdf [file NIHMS241674-supplement-Suppl_Figure_1.pdf]
