# Supplementary material
Source: PubMed Central journal article supplement (PMC2996461)
Supplement: NIHMS241674-supplement-Suppl_Table_1.pdf [file NIHMS241674-supplement-Suppl_Table_1.pdf]

**Supplemental Information -- Table 1.** Stable isotope labeled, proteotypic peptide standards used to quantify trypsin digestion of 45 plasma proteins.

| Protein                          | Uniprot accession | Sequence Before | Cleavage probability <sup>a</sup> (%) | Peptide sequence     | Cleavage probability <sup>b</sup> (%) | Sequence Following | Peptide mw (Da) | Technical reproducibility <sup>a</sup> (%CV) |
|----------------------------------|-------------------|-----------------|---------------------------------------|----------------------|---------------------------------------|--------------------|-----------------|----------------------------------------------|
| Afamin                           | P43652            | ER              | 89.7                                  | DADPDTFFAK           | 100                                   | F                  | 1,125.5         | 8.3                                          |
| Albumin, serum                   | P02768            | VK              | 100                                   | LVNEVTEFAK           | 93.1                                  | T                  | 1,148.6         | 7.0                                          |
| Alpha-1-acid glycoprotein 1      | P02763            | EK              | 91.1                                  | NWGLSVYADKPETTK      | 90.9                                  | E                  | 1,707.8         | 18.7                                         |
| Alpha-1-antichymotrypsin         | P01011            | FR              | 69.6                                  | EI GELYLPK           | 100                                   | F                  | 1,060.6         | 5.9                                          |
| Alpha-1B-glycoprotein            | P04217            | AR              | 100                                   | LETPDFQLFK           | 100                                   | N                  | 1,236.6         | 15.6                                         |
| Alpha-2-antiplasmin              | P08697            | LK              | 100                                   | LGNOEPPGGTALK        | 100                                   | S                  | 1,311.7         | 7.8                                          |
| Alpha-2-macroglobulin            | P01023            | AR              | 100                                   | LLI YAVLPTGDVI GDSAK | 100                                   | Y                  | 1,844.0         | 18.4                                         |
| Angiotensinogen                  | P01019            | EK              | 94.4                                  | ALODQLVLVAAK         | 94.9                                  | L                  | 1,267.8         | 7.9                                          |
| Antithrombin-III                 | P01008            | GR              | 100                                   | DDLTVSDAFHK          | 100                                   | A                  | 1,308.6         | 9.0                                          |
| Apolipoprotein A-I               | P02647            | AK              | 95.4                                  | ATEHLSTLSEK          | 94.4                                  | A                  | 1,214.6         | 6.9                                          |
| Apolipoprotein A-II precursor    | P02652            | VK              | 100                                   | SPELQAEAK            | 100                                   | S                  | 971.5           | 7.4                                          |
| Apolipoprotein A-IV              | P06727            | RR              | 75.3                                  | SLAPYAODTQEK         | 94.7                                  | L                  | 1,349.7         | 7.3                                          |
| Apolipoprotein B-100             | P04114            | VK              | 100                                   | FPEVDVLTK            | 100                                   | Y                  | 1,046.6         | 6.1                                          |
| Apolipoprotein C-I lipoprotein   | P02654            | N-term.         | N.A.                                  | TPDVSSALDK           | 76.8                                  | L                  | 1,031.5         | 5.8                                          |
| Apolipoprotein C-III             | P02656            | AR              | 100                                   | GWVTDGFSLLK          | 86.4                                  | D                  | 1,195.6         | 17.3                                         |
| Apolipoprotein E                 | P02649            | ER              | 100                                   | LGPLVEQGR            | 100                                   | V                  | 967.6           | 8.7                                          |
| Beta-2-glycoprotein I            | P02749            | KK              | 87.5                                  | ATVVYQGER            | 94.1                                  | V                  | 1,021.5         | 7.7                                          |
| Ceruloplasmin                    | P00450            | YR              | 85.3                                  | EYTDASFNR            | 75.9                                  | K                  | 1,202.5         | 11.5                                         |
| Clusterin                        | P10909            | RR              | 79.2                                  | ELDESLQVAER          | 100                                   | L                  | 1,287.6         | 15.7                                         |
| Coagulation factor XIIIa HC      | P00748            | TR              | 100                                   | VVGLVALR             | 100                                   | G                  | 882.6           | 5.6                                          |
| Complement C3                    | P01024            | LK              | 100                                   | TGLOEVEVK            | 100                                   | A                  | 1,001.5         | 6.3                                          |
| Complement C4 beta chain         | P0C0L5            | PR              | 100                                   | VGDTLNLNLR           | 95.7                                  | A                  | 1,113.6         | 11.2                                         |
| Complement C4 gamma chain        | P0C0L5            | TK              | 100                                   | I TQVLHFTK           | 100                                   | D                  | 1,085.6         | 7.0                                          |
| Complement component C9          | P02748            | FR              | 100                                   | TEHYEEQI EAFK        | 100                                   | S                  | 1,522.7         | 26.6                                         |
| Complement factor B              | P00751            | QK              | 84.3                                  | EELLPAQDI K          | 95.3                                  | A                  | 1,154.6         | 7.5                                          |
| Complement factor H              | P08603            | CK              | 100                                   | SPDVI NGSPI SOK      | 100                                   | I                  | 1,340.7         | 10.2                                         |
| Fibrinogen alpha chain           | P02671            | SR              | 100                                   | GSESGI FTNTK         | 90.9                                  | E                  | 1,139.6         | 4.0                                          |
| Fibrinogen beta chain            | P02675            | YK              | 100                                   | QGFQVAVTNDGK         | 92.7                                  | N                  | 1,307.6         | 8.3                                          |
| Fibrinogen gamma chain           | P02679            | CK              | 51.6                                  | DTVQI HDI TGK        | 95.1                                  | D                  | 1,225.6         | 14.7                                         |
| Gelsolin, isoform 1              | P06396            | EK              | 100                                   | TGAQELLR             | 100                                   | V                  | 886.5           | 11.2                                         |
| Haptoglobin beta chain           | P00738            | GR              | 100                                   | VGYSVWGR             | 100                                   | N                  | 979.5           | 6.2                                          |
| Hemopexin                        | P02790            | WK              | 100                                   | NFPSPVDAEFR          | 100                                   | Q                  | 1,219.6         | 10.7                                         |
| Heparin cofactor II              | P05546            | MK              | 100                                   | TLEAQLTPR            | 100                                   | V                  | 1,027.6         | 5.7                                          |
| Inter-alpha-trypsin inhibitor HC | P19827            | RK              | 89.1                                  | AAI SGENAGLVR        | 100                                   | A                  | 1,156.6         | 6.7                                          |
| Kininogen-1                      | P01042            | TK              | 93.1                                  | TVGSDTFYSFK          | 76.8                                  | Y                  | 1,250.6         | 11.9                                         |
| L-selectin                       | P14151            | NK              | 100                                   | AEI EYLEK            | 100                                   | T                  | 993.5           | 11.6                                         |
| Plasma retinol-binding protein   | P02753            | MK              | 100                                   | YWGVSFLQK            | 100                                   | G                  | 1,197.6         | 15.3                                         |
| Plasminogen                      | P00747            | SR              | 100                                   | LFLEPTR              | 82.3                                  | K                  | 874.5           | 10.8                                         |
| Prothrombin                      | P00734            | DR              | 75.5                                  | ETAASLLQAGYK         | 88.2                                  | G                  | 1,250.7         | 13.0                                         |
| Serum amyloid P-component        | P02743            | ER              | 94.1                                  | VGEYSLYI GR          | 100                                   | H                  | 1,155.6         | 22.1                                         |
| Transferrin                      | P02787            | SK              | 84.6                                  | EDPDTFYAVAVVK        | 100                                   | K                  | 1,628.8         | 11.8                                         |
| Transthyretin                    | P02766            | RK              | 89.1                                  | AADDTWEPFASGK        | 100                                   | T                  | 1,393.6         | 9.4                                          |
| Vitamin D-binding protein        | P02774            | RR              | 89.2                                  | THLPEVFLSK           | 100                                   | V                  | 1,169.6         | 19.8                                         |
| Vitronectin                      | P04004            | WR              | 100                                   | FEDGVLDPDYPR         | 100                                   | N                  | 1,421.7         | 19.8                                         |
| Zinc-alpha-2-glycoprotein        | P25311            | NK              | 89.8                                  | EI PAWVFPDPAQI TK    | 100                                   | Q                  | 1,781.9         | 8.6                                          |

<sup>a</sup>As calculated using the model of Keil (1992). <sup>b</sup>Values as reported by Kuzyk *et al.* MCP (2009).
