# Supplementary material
Source: PubMed Central journal article supplement (PMC2996461)
Supplement: NIHMS241674-supplement-Suppl_Table_2.pdf [file NIHMS241674-supplement-Suppl_Table_2.pdf]

**Supplemental Information – Table 2.** MRM parameters and analytical precision of MRM assays based on proteotypic tryptic peptides for 45 plasma proteins. Masses listed are for the natural forms of all 45 peptides. This research was originally published in *Molecular & Cellular Proteomics*. Kuzyk, M.; Smith, D.; Yang, J.; Cross, T.; Jackson, A.; Hardie, D.; Anderson, L.; Borchers, C., MRM-based, Multiplexed, Absolute Quantitation of 45 proteins in human plasma. *Molecular and Cellular Proteomics* **2009**, 8, (8), 1860-1877 © the American Society for Biochemistry and Molecular Biology.

| Protein                        | Uniprot accession | Peptide sequence   | Peptide mw (Da) | Q1 <sup>a</sup> | Q3 <sup>b</sup> | DP <sup>c</sup> (V) | CE <sup>d</sup> (V) | Fragment ion | % CV <sup>e</sup> | Fold signal increase <sup>f</sup> | Putative disease association | References                              |
|--------------------------------|-------------------|--------------------|-----------------|-----------------|-----------------|---------------------|---------------------|--------------|-------------------|-----------------------------------|------------------------------|-----------------------------------------|
| Albumin                        | P43652            | DADPDITFAK         | 1125.5          | 563.8           | 825.4           | 60                  | 24                  | y7           | 5.4               | 11.1                              | ovarian cancer               | Jackson <i>et al.</i> 2007              |
|                                |                   |                    | 563.8           | 413.2           | 60              | 23                  | y7++                | 6.1          |                   |                                   |                              |                                         |
|                                |                   |                    | 563.8           | 940.4           | 60              | 27                  | y8                  | 6.9          |                   |                                   |                              |                                         |
| Albumin, serum                 | P02768            | LVNEVTEFAK         | 1148.6          | 575.3           | 185.2           | 70                  | 32                  | a2           | 1.4               |                                   | CVD                          | Anderson 2005                           |
|                                |                   |                    | 575.3           | 937.5           | 70              | 25                  | y8                  | 1.4          | 4.5               |                                   |                              |                                         |
| Alpha-1-acid glycoprotein I    | P02763            | NWGLSVYADKPETTK    | 1707.8          | 570.3           | 704.9           | 56                  | 24                  | y13++        | 2.2               | 14.0                              | CVD, cervical cancers        | Anderson 2005, Polanski & Anderson 2006 |
|                                |                   |                    | 570.3           | 273.1           | 56              | 30                  | a2                  | 3.6          |                   |                                   |                              |                                         |
|                                |                   |                    | 570.3           | 301.1           | 56              | 25                  | b2                  | 6.0          |                   |                                   |                              |                                         |
| Alpha-1-antichymotrypsin       | P01011            | EIGELYLPK          | 1060.6          | 531.3           | 244.2           | 60                  | 31                  | y2           | 4.1               |                                   | CVD,                         | Anderson 2005,                          |
|                                |                   |                    | 531.3           | 819.5           | 60              | 24                  | y7                  | 3.5          | 28.2              | Alzheimer's disease               | DeKosky <i>et al.</i> 2003   |                                         |
| Alpha-1B-glycoprotein          | P04217            | LETPDFOLFK         | 1236.6          | 619.3           | 243.1           | 65                  | 31                  | b2           | 2.0               |                                   | pancreatic,                  | Tian <i>et al.</i> 2008,                |
|                                |                   |                    | 619.3           | 894.5           | 65              | 28                  | y7                  | 1.5          | 2.5               | liver & bladder cancers           | Kreinin <i>et al.</i> 2007,  |                                         |
| Alpha-2-antiplasmin            | P08697            | LGNDEPGGQALK       | 1311.7          | 656.8           | 771.4           | 82                  | 33                  | y8           | 2.6               | 1.2                               | CVD                          | Yoon <i>et al.</i> 2006                 |
|                                |                   |                    | 656.8           | 542.3           | 82              | 31                  | b5                  | 3.0          |                   |                                   |                              |                                         |
|                                |                   |                    | 656.8           | 900.5           | 82              | 33                  | y9                  | 6.2          |                   |                                   |                              |                                         |
| Alpha-2-macroglobulin          | P01023            | LLIYAVLPTGDVIGDSAK | 1844.0          | 615.7           | 586.8           | 58                  | 17                  | y12++        | 2.2               | 19.1                              | CVD                          | Anderson 2005                           |
|                                |                   |                    | 615.7           | 673.4           | 58              | 17                  | b6                  | 1.7          |                   |                                   |                              |                                         |
| Angiotensinogen                | P01019            | ALQDQLVAAK         | 1267.8          | 634.9           | 542.8           | 73                  | 25                  | y10++        | 5.1               | 3.7                               | CVD                          | Anderson 2005                           |
|                                |                   |                    | 634.9           | 956.6           | 73              | 29                  | y9                  | 5.7          |                   |                                   |                              |                                         |
|                                |                   |                    | 634.9           | 289.2           | 73              | 29                  | y3                  | 5.1          |                   |                                   |                              |                                         |
| Antithrombin-III               | P01008            | DDLIVSDAFHK        | 1308.6          | 437.2           | 540.3           | 47                  | 17                  | y9++         | 4.7               | 7.6                               | CVD                          | Anderson 2005                           |
|                                |                   |                    | 437.2           | 483.7           | 47              | 18                  | y8++                | 4.8          |                   |                                   |                              |                                         |
| Apolipoprotein A-I             | P02647            | ATEHLSTLSEK        | 1214.6          | 405.9           | 572.8           | 52                  | 19                  | y10++        | 1.1               |                                   | CVD                          | Anderson 2005                           |
|                                |                   |                    | 405.9           | 522.3           | 52              | 18                  | y9++                | 1.7          | 8.4               |                                   |                              |                                         |
|                                |                   |                    | 405.9           | 363.2           | 52              | 24                  | y3                  | 1.4          |                   |                                   |                              |                                         |
| Apolipoprotein A-II precursor  | P02652            | SPELOAEAK          | 971.5           | 486.8           | 443.2           | 64                  | 26                  | y8++         | 5.7               | 1.6                               | CVD,                         | Anderson 2005,                          |
|                                |                   |                    | 486.8           | 157.1           | 64              | 34                  | a2                  | N.D.         | prostate cancer   | Malik 2005                        |                              |                                         |
| Apolipoprotein A-IV            | P06727            | SLAPYAODTQEK       | 1349.7          | 675.8           | 540.3           | 67                  | 30                  | y9++         | 2.7               | 6.6                               | CVD                          | Anderson 2005                           |
|                                |                   |                    | 675.8           | 575.8           | 67              | 30                  | y10++               | 5.7          |                   |                                   |                              |                                         |
| Apolipoprotein B-100           | P04114            | FPEVDVLTK          | 1046.6          | 524.3           | 450.8           | 65                  | 28                  | y8++         | 2.9               | 5.4                               | coronary heart disease       | Talmud <i>et al.</i> 2002               |
|                                |                   |                    | 524.3           | 803.5           | 65              | 26                  | y7                  | 4.4          |                   |                                   |                              |                                         |
|                                |                   |                    | 524.3           | 674.4           | 65              | 32                  | y6                  | 8.9          |                   |                                   |                              |                                         |
| Apolipoprotein C-I lipoprotein | P02654            | TPDVSSALDK         | 1031.5          | 516.8           | 466.2           | 78                  | 29                  | y9++         | 2.5               | 8.9                               | CVD                          | Anderson 2005                           |
|                                |                   |                    | 516.8           | 834.4           | 78              | 29                  | y8                  | 3.0          |                   |                                   |                              |                                         |
| Apolipoprotein C-III           | P02656            | GNVTDGFSSLK        | 1195.6          | 598.8           | 244.1           | 59                  | 31                  | b2           | 1.1               |                                   | CVD                          | Anderson 2005                           |
|                                |                   |                    | 598.8           | 854.4           | 59              | 26                  | y8                  | 1.9          | 4.5               |                                   |                              |                                         |
|                                |                   |                    | 598.8           | 953.5           | 59              | 25                  | y9                  | 2.5          |                   |                                   |                              |                                         |

|                            |        |                |        |       |        |    |    |      |      |      |                                 |                            |
|----------------------------|--------|----------------|--------|-------|--------|----|----|------|------|------|---------------------------------|----------------------------|
| Apolipoprotein E           | P02649 | LGPLVEQGR      | 967.6  | 484.8 | 399.7  | 70 | 25 | y7++ | 3.6  | 11.0 | CVD                             | Anderson 2005              |
|                            |        |                |        | 484.8 | 588.3  | 70 | 30 | y5   | 3.8  |      |                                 |                            |
|                            |        |                |        | 484.8 | 489.2  | 70 | 28 | y4   | 4.3  |      |                                 |                            |
| Beta-2-glycoprotein I      | P02749 | ATVWVGGER      | 1021.5 | 511.8 | 652.3  | 65 | 25 | y5   | 1.6  |      | CVD                             | Anderson 2005              |
|                            |        |                |        | 511.8 | 751.4  | 65 | 25 | y6   | 1.6  | 3.2  |                                 |                            |
|                            |        |                |        | 511.8 | 850.4  | 65 | 25 | y7   | 1.9  |      |                                 |                            |
| Ceruloplasmin              | P00450 | EYTDASFTR      | 1202.5 | 602.3 | 624.3  | 66 | 29 | y5   | 6.0  | 1.4  | CVD                             | Anderson 2005              |
|                            |        |                |        | 602.3 | 911.4  | 66 | 29 | y4   | 6.0  |      |                                 |                            |
|                            |        |                |        | 602.3 | 695.4  | 66 | 32 | y6   | 5.2  |      |                                 |                            |
| Clusterin                  | P10909 | ELDESLOVAER    | 1287.6 | 644.8 | 375.2  | 75 | 30 | y3   | 5.7  |      | CVD                             | Anderson 2005              |
|                            |        |                |        | 644.8 | 802.4  | 75 | 33 | y7   | 6.7  |      |                                 |                            |
|                            |        |                |        | 644.8 | 602.3  | 75 | 31 | y5   | 5.1  | 2.2  |                                 |                            |
| Coagulation factor-XIIa HC | P00748 | VGGGLVALR      | 882.6  | 442.3 | 685.4  | 60 | 21 | y7   | 2.6  | 15.4 | CVD                             | Anderson 2005              |
|                            |        |                |        | 442.3 | 171.1  | 60 | 25 | a2   | 4.9  |      |                                 |                            |
|                            |        |                |        | 442.3 | 199.1  | 60 | 21 | b2   | 3.9  |      |                                 |                            |
| Complement C3              | P01024 | TGLOEVEVK      | 1001.5 | 501.8 | 731.4  | 65 | 25 | y6   | 3.0  | 1.8  | CVD                             | Anderson 2005              |
|                            |        |                |        | 501.8 | 603.3  | 65 | 26 | y5   | 1.7  |      |                                 |                            |
|                            |        |                |        | 501.8 | 422.7  | 65 | 25 | y7++ | 6.4  |      |                                 |                            |
| Complement C4 beta chain   | P0C0L5 | VGDTLNLNLR     | 1113.6 | 557.8 | 629.4  | 70 | 31 | y5   | 6.9  | 1.1  | CVD,                            | Anderson 2005,             |
|                            |        |                |        | 557.8 | 742.5  | 70 | 30 | y6   | 5.4  |      | renal carcinoma                 | Polanski & Anderson 2006   |
|                            |        |                |        | 557.8 | 1015.5 | 70 | 32 | y9   | 7.2  |      |                                 |                            |
| Complement C4 gamma chain  | P0C0L5 | ITQVLHFTK      | 1085.6 | 362.9 | 487.3  | 88 | 16 | y8++ | 3.7  | 5.3  | CVD,                            | Anderson 2005,             |
|                            |        |                |        | 362.9 | 436.8  | 88 | 15 | y7++ | 6.3  |      | renal carcinoma                 | Polanski & Anderson 2006   |
|                            |        |                |        | 362.9 | 215.1  | 88 | 18 | b2   | 10.1 |      |                                 |                            |
| Complement component C9    | P02748 | TEHYEQI EAFK   | 1522.7 | 508.6 | 494.3  | 66 | 23 | y4   | 11.3 | 3.6  |                                 |                            |
|                            |        |                |        | 508.6 | 607.3  | 66 | 21 | y5   | 11.8 |      |                                 |                            |
|                            |        |                |        | 508.6 | 917.4  | 66 | 19 | b7   | 15.6 |      |                                 |                            |
| Complement factor B        | P00751 | EELLPAQDI K    | 1154.6 | 578.3 | 671.4  | 65 | 25 | y6   | 2.3  | 18.5 |                                 |                            |
|                            |        |                |        | 578.3 | 372.2  | 65 | 29 | b3   | 3.8  |      |                                 |                            |
|                            |        |                |        | 578.3 | 259.1  | 65 | 39 | b2   | 5.5  |      |                                 |                            |
| Complement factor H        | P08603 | SPDVINGSPI SQK | 1340.7 | 671.4 | 830.4  | 77 | 35 | y8   | 7.5  | 2.4  | Acute macular degeneration      | Klein, <i>et al.</i> 2005  |
|                            |        |                |        | 671.4 | 943.5  | 77 | 35 | y9   | 6.8  |      |                                 |                            |
|                            |        |                |        | 671.4 | 399.2  | 77 | 37 | b4   | 7.1  |      |                                 |                            |
| Fibrinogen alpha chain     | P02671 | GSESGI FTNTK   | 1139.6 | 570.8 | 610.3  | 61 | 26 | y5   | 2.2  | 1.5  | CVD, oral cancer                | Anderson 2005,             |
|                            |        |                |        | 570.8 | 867.5  | 61 | 28 | y8   | 3.3  |      |                                 | Cheng <i>et al.</i> 2005   |
|                            |        |                |        | 570.8 | 780.4  | 61 | 25 | y7   | 3.0  |      |                                 |                            |
| Fibrinogen beta chain      | P02675 | OGFGNVAINTDGK  | 1307.6 | 654.8 | 706.3  | 85 | 34 | y7   | 2.4  | 1.3  | CVD,                            | Anderson 2005,             |
|                            |        |                |        | 654.8 | 635.3  | 85 | 34 | y6   | 2.1  |      | gastrointestinal                | Kang <i>et al.</i> 2006    |
|                            |        |                |        | 654.8 | 805.4  | 85 | 34 | y8   | 2.7  |      | siromal tumor                   |                            |
| Fibrinogen gamma chain     | P02679 | DTVQI HDI TGK  | 1225.6 | 409.6 | 505.8  | 49 | 17 | y9++ | 2.9  | 8.1  | CVD,                            | Anderson 2005,             |
|                            |        |                |        | 409.6 | 189.1  | 49 | 22 | a2   | 6.2  |      | Alzheimer's disease             | Lee <i>et al.</i> 2007     |
|                            |        |                |        | 409.6 | 217.1  | 49 | 19 | b2   | 8.4  |      |                                 |                            |
| Gelsolin, isoform I        | P06396 | TGAQELLR       | 886.5  | 444.3 | 159.1  | 70 | 28 | b2   | 4.9  |      | progression to breast carcinoma | Winston <i>et al.</i> 2001 |
|                            |        |                |        | 444.3 | 530.3  | 70 | 25 | y4   | 5.4  | 1.2  |                                 |                            |
|                            |        |                |        | 444.3 | 658.4  | 70 | 25 | y5   | 6.3  |      |                                 |                            |
| Haptoglobin beta chain     | P00738 | VGYVSGWGR      | 979.5  | 490.8 | 562.3  | 61 | 25 | y5   | 1.7  | 2.6  | CVD                             | Anderson 2005              |
|                            |        |                |        | 490.8 | 320.2  | 61 | 25 | b3   | 1.7  |      |                                 |                            |
|                            |        |                |        | 490.8 | 661.3  | 61 | 25 | y6   | 1.9  |      |                                 |                            |

|                                  |        |                  |        |              |               |           |           |              |             |      |                              |                            |
|----------------------------------|--------|------------------|--------|--------------|---------------|-----------|-----------|--------------|-------------|------|------------------------------|----------------------------|
| Hemopexin                        | P02790 | NFSPVDAAFR       | 1219.6 | <b>610.8</b> | <b>480.3</b>  | <b>59</b> | <b>25</b> | <b>y9++</b>  | <b>0.8</b>  | 3.1  | CVD                          | Anderson 2005              |
|                                  |        |                  |        | 610.8        | 234.1         | 59        | 33        | a2           | 1.1         |      |                              |                            |
|                                  |        |                  |        | 610.8        | 959.5         | 59        | 26        | y9           | 1.3         |      |                              |                            |
| Heparin cofactor II              | P05546 | TLEAQLTPR        | 1027.6 | <b>514.8</b> | <b>814.4</b>  | <b>65</b> | <b>25</b> | <b>y7</b>    | <b>6.0</b>  | 7.8  | CVD                          | Anderson 2005              |
|                                  |        |                  |        | 514.8        | 685.4         | 65        | 27        | y6           | 5.8         |      |                              |                            |
|                                  |        |                  |        | 514.8        | 373.2         | 65        | 25        | y3           | 6.9         |      |                              |                            |
| Inter-alpha-trypsin inhibitor HC | P19827 | AAI SGENAGLVR    | 1156.6 | <b>579.3</b> | <b>902.5</b>  | <b>66</b> | <b>28</b> | <b>y9</b>    | <b>3.5</b>  | 10.3 |                              |                            |
|                                  |        |                  |        | 579.3        | 815.4         | 66        | 30        | y8           | 4.2         |      |                              |                            |
|                                  |        |                  |        | 579.3        | 508.3         | 66        | 26        | y10++        | 3.1         |      |                              |                            |
| Kininogen-1                      | P01042 | TVGSDTFYSFK      | 1250.6 | 626.3        | 173.1         | 62        | 40        | a2           | 2.7         |      | colorectal cancer            | Qiu <i>et al.</i> 2008     |
|                                  |        |                  |        | <b>626.3</b> | <b>1051.5</b> | <b>62</b> | <b>26</b> | <b>y9</b>    | <b>2.8</b>  | 33.0 |                              |                            |
|                                  |        |                  |        | 626.3        | 201.1         | 62        | 29        | b2           | 2.6         |      |                              |                            |
| L-selectin                       | P14151 | AEIEVLEK         | 993.5  | <b>497.8</b> | <b>794.4</b>  | <b>64</b> | <b>21</b> | <b>y6</b>    | <b>12.4</b> | 6.0  | CVD                          | Anderson 2005              |
|                                  |        |                  |        | 497.8        | 201.1         | 64        | 23        | b2           | 10.1        |      |                              |                            |
|                                  |        |                  |        | 497.8        | 173.1         | 64        | 29        | a2           | 19.6        |      |                              |                            |
| Plasma retinol-binding protein   | P02753 | YWGVSFLQK        | 1197.6 | 599.8        | 849.5         | 76        | 28        | y8           | 5.8         |      | lung cancer                  | Patz <i>et al.</i> 2007    |
|                                  |        |                  |        | 599.8        | 350.2         | 76        | 27        | b2           | 3.7         |      |                              |                            |
|                                  |        |                  |        | <b>599.8</b> | <b>693.4</b>  | <b>76</b> | <b>29</b> | <b>y6</b>    | <b>3.7</b>  | 5.5  |                              |                            |
| Plasminogen                      | P00747 | LLEPTR           | 874.5  | <b>438.3</b> | <b>615.3</b>  | <b>52</b> | <b>21</b> | <b>y5</b>    | <b>2.6</b>  | 5.5  | CVD                          | Anderson 2005              |
|                                  |        |                  |        | 438.3        | 233.2         | 52        | 25        | a2           | 3.9         |      |                              |                            |
|                                  |        |                  |        | 438.3        | 261.2         | 52        | 22        | b2           | 3.4         |      |                              |                            |
| Prothrombin                      | P00734 | ETAASLLOAGYK     | 1250.7 | 626.3        | 679.4         | 70        | 29        | y6           | 5.5         |      | CVD                          | Anderson 2005              |
|                                  |        |                  |        | <b>626.3</b> | <b>879.5</b>  | <b>70</b> | <b>29</b> | <b>y8</b>    | <b>7.1</b>  | 3.9  |                              |                            |
|                                  |        |                  |        | 626.3        | 792.5         | 70        | 29        | y7           | 4.3         |      |                              |                            |
| Serum amyloid P-component        | P02743 | VGEYSLYIGR       | 1155.6 | <b>578.8</b> | <b>708.4</b>  | <b>80</b> | <b>27</b> | <b>y6</b>    | <b>6.6</b>  | 3.2  | renal cancer                 | Polanski & Anderson 2006   |
|                                  |        |                  |        | 578.8        | 508.3         | 80        | 29        | y4           | 7.2         |      |                              |                            |
|                                  |        |                  |        | 578.8        | 871.5         | 80        | 27        | y7           | 8.5         |      |                              |                            |
| Transferrin                      | P02787 | EDPQTFYAVAVK     | 1628.8 | <b>815.4</b> | <b>693.4</b>  | <b>75</b> | <b>34</b> | <b>y12++</b> | <b>1.0</b>  | 68.7 | CVD,<br>early ovarian cancer | Kozak <i>et al.</i> 2005   |
|                                  |        |                  |        | 815.4        | 912.5         | 75        | 33        | y8           | 1.3         |      |                              |                            |
|                                  |        |                  |        | 815.4        | 1059.6        | 75        | 38        | y9           | 2.3         |      |                              |                            |
| Transferrin                      | P02766 | AADDTWEPFASGK    | 1393.6 | <b>697.8</b> | <b>606.3</b>  | <b>70</b> | <b>38</b> | <b>y6</b>    | <b>1.9</b>  | 92.9 | ovarian cancer               | Polanski & Anderson 2006   |
|                                  |        |                  |        | 697.8        | 921.5         | 70        | 32        | y8           | 2.7         |      |                              |                            |
|                                  |        |                  |        | 697.8        | 735.4         | 70        | 31        | y7           | 4.0         |      |                              |                            |
| Vitamin D-binding protein        | P02774 | THLPEVFLSK       | 1169.6 | <b>390.9</b> | <b>494.3</b>  | <b>44</b> | <b>17</b> | <b>y4</b>    | <b>3.5</b>  | 12.7 | prostate cancer              | Hlavaty <i>et al.</i> 2003 |
|                                  |        |                  |        | 390.9        | 578.3         | 44        | 17        | b5           | 3.6         |      |                              |                            |
|                                  |        |                  |        | 390.9        | 352.2         | 44        | 25        | b3           | 4.8         |      |                              |                            |
| Vitronectin                      | P04004 | FEDGVLDPDYPK     | 1421.7 | 711.8        | 875.4         | 75        | 31        | y7           | 3.2         |      | CVD                          | Anderson 2005              |
|                                  |        |                  |        | <b>711.8</b> | <b>647.3</b>  | <b>75</b> | <b>42</b> | <b>y5</b>    | <b>3.6</b>  | 5.8  |                              |                            |
|                                  |        |                  |        | 711.8        | 762.3         | 75        | 32        | y6           | 4.2         |      |                              |                            |
| Zinc-alpha-2-glycoprotein        | P25311 | EIPAWPFDPAAGI TK | 1781.9 | 892.0        | 1087.6        | 55        | 40        | y10          | 3.5         |      | prostate cancer              | Hale <i>et al.</i> 2001    |
|                                  |        |                  |        | <b>892.0</b> | <b>770.9</b>  | <b>55</b> | <b>35</b> | <b>y14++</b> | <b>3.7</b>  | 48.1 |                              |                            |
|                                  |        |                  |        | 892.0        | 696.4         | 55        | 34        | b6           | 4.4         |      |                              |                            |

<sup>a</sup>Q1, endogenous peptide precursor  $m/z$ ; <sup>b</sup>Q3, fragment ion  $m/z$ ; <sup>c</sup>DP, declustered potential; <sup>d</sup>CE, collision energy. <sup>e</sup>Determined as one standard deviation proportional to the mean; <sup>f</sup>Intensity of optimized MRM Q1/Q3 pairs versus intensity of *in silico* predicted MRM Q1/Q3 ion pairs using the first y fragment ion > precursor ion  $m/z$ , with a CE  $v$  calculated using  $CE = m/z \times 0.05 + 5$ .
